# Supplementary material
Source: PubMed Central journal article supplement (PMC2864497)

# Formal [4+3] Epoxide Cascade Reactions via a Complementary Ambiphilic Pairing Strategy

*Alan Rolfe, Thiwanka Samarakoon and Paul R. Hanson\**

<sup>a</sup>*Department of Chemistry, University of Kansas, 1251 Wescoe Hall Drive, Lawrence, KS 66045-7582*

<sup>b</sup>*The Center for Chemical Methodologies and Library Development at the University of Kansas (KU-CMLD), 2121 Simons Drive, Structural Biology Center, West Campus, Lawrence, KS 66047, USA*

phanson@ku.edu

## Table of contents

|                                                    |        |
|----------------------------------------------------|--------|
| General Experimental Section                       | S2     |
| General experiment Methods <b>A-D</b>              | S3     |
| Experimental data for compounds <b>1-3</b>         | S4     |
| Experimental data for compounds <b>4-6</b>         | S5     |
| Experimental data for compounds <b>7-9</b>         | S6     |
| Experimental data for compounds <b>11-13</b>       | S7     |
| Experimental data for compounds <b>14-16</b>       | S8     |
| Experimental data for compounds <b>17-19</b>       | S9     |
| Experimental data for compounds <b>20-21</b>       | S10    |
| Experimental data for compounds <b>22-24</b>       | S11    |
| <br>                                               |        |
| <sup>1</sup> H NMR and <sup>13</sup> C NMR spectra | S12-34 |

## Experimental Section

General procedures: All air and moisture sensitive reactions were carried out in flame- or oven-dried glassware under argon atmosphere using standard gas tight syringes, cannula, and septa. Microwave reactions were carried out using Biotage Initiator using 0.5-2.0 mL, 2.0-5.0 mL, and 10-20 mL Vials. THF, CH<sub>2</sub>Cl<sub>2</sub>, CH<sub>3</sub>CN was purified by passage through the Solv-Tek purification system employing activated Al<sub>2</sub>O<sub>3</sub> (Grubbs, R. H.; Rosen, R. K.; Timmers, F. J. *Organometallics* **1996**, *15*, 1518-1520). Et<sub>3</sub>N was purified by passage over basic alumina and stored over KOH. Flash column chromatography was performed with SiO<sub>2</sub> from Sorbent Technology (30930M-25, Silica Gel 60A, 40-63  $\mu$ m). Thin layer chromatography was performed on silica gel 60F254 plates (EM-5717, Merck). Deuterated solvents were purchased from Cambridge Isotope laboratories. <sup>1</sup>H and <sup>13</sup>C NMR spectra were recorded on a Bruker DRX-400 NMR spectrometer operating at 400 MHz and 100 MHz respectively; or a Bruker Avance operating at 500 MHz and 125 MHz respectively. High-resolution mass spectrometry (HRMS) were obtained on a VG Instrument ZAB double-focusing mass spectrometer.

**General Procedure A** for the synthesis of  $\alpha$ -fluorobenzenesulfonamides. To a vigorously stirred solution of amine (8 mmol, 1.2 equiv.) in  $\text{CH}_2\text{Cl}_2$  (33.0 mL, 0.2 M) in a round bottom flask was added  $\text{Et}_3\text{N}$  (3 equiv.). A solution of  $\alpha$ -fluorobenzenesulfonamides (6.66 mmol, 1.0 equiv.) was added dropwise, and the reaction was stirred for 4-8 hours. Upon disappearance of sulfonyl chloride, 10% HCl (10 mL) was added and the reaction was stirred for 10 minutes. The organic layer was separated and the aqueous layer extracted with  $\text{CH}_2\text{Cl}_2$  (3 x 15 mL). The combined organic layers were washed with brine (20 mL), dried ( $\text{MgSO}_4$ ) and concentrated under reduced pressure. The resulting crude product was purified by flash chromatography (3:1, hexane:EtOAc) to afford the desired  $\alpha$ -fluorobenzene sulfonamide.

**General procedure B** for the synthesis of 1,2-benzoxathiazepine-1,1-dioxides **1-9** from  $\alpha$ -fluorobenzene sulfonamides: Into a microwave vial (0.5-2.0 mL) was added  $\alpha$ -fluorobenzene sulfonamide (0.5 mmol), anhydrous  $\text{Cs}_2\text{CO}_3$  (1.5 mmol),  $\text{BnEt}_3\text{NCl}$  (0.05 mmol), epoxide (0.5 mmol) and dry dioxane/DMF (1:1, 1M). The microwave vial was heated at 110 °C for 20 minutes, after such time the reaction was purified (directly loading of crude reaction mixture) by flash chromatography (8:2 hexane/EtOAc) to afford the desired sultam.

**General Procedure C** for the synthesis of 1,2-benzoxathiazepine-1,1-dioxides **12-16** from (*R*)-(2-Allyl-9-fluoro-1,2-benzoxathiazepine-1,1-dioxide)methanol **11**. A solution of sultam **11** (50 mg, 0.174 mmol, 1 equiv.), acid (0.174 mmol, 1 equiv.) and DMAP (2.1mg, 17.4  $\mu\text{mol}$ , 0.1 equiv.) in dry  $\text{CH}_2\text{Cl}_2$  (0.87 mL) was added to a stirring solution of OACC<sub>50</sub> (3.2 mmol/g, 81 mg, 0.26 mmol, 1.5 equiv.) in dry  $\text{CH}_2\text{Cl}_2$  (0.87 mL) at 0 °C. The reaction was stirred for 10 minutes at 0 °C, and an additional 6 hours at RT. After complete of reaction (TLC monitoring), the crude reaction mixture was diluted with EtOAc (1 mL) and the resulting slurry was added to silica SPE. The silica SPE was flushed with eluent (hexane:EtOAc, 4 x 5 mL) and the resulting mother liquor was concentrated to yield the desired sultam.

**General procedure D** for the synthesis of 1,4,5-oxathiazepine-4,4-dioxides **17-24** from vinylsulfonamides: Into a microwave vial (0.5-2.0 mL) was added vinylsulfonamide (0.5 mmol), anhydrous  $\text{Cs}_2\text{CO}_3$  (1.5 mmol),  $\text{BnEt}_3\text{NCl}$  (0.05 mmol), epoxide (0.5 mmol) and dry dioxane/THF (1:1, 1M). The microwave vial was heated at 110°C for 20 minutes, after such time the reaction was purified (directly loading of crude reaction mixture) by flash chromatography (7:3 to 1:1 hexane/EtOAc) to afford the desired sultam.

#### 4-(Benzyloxymethyl)-2-butyl-9-fluoro-1,2-benzoxathiazepine-1,1-dioxide (1).

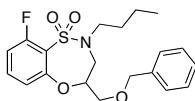

Using general procedure **B**, sultam **1** was produced in 73% (143 mg, 0.36 mmol) as a colorless liquid. FTIR (neat): 2956, 1604, 1461, 1350, 1161  $\text{cm}^{-1}$ ;  $^1\text{H}$  NMR (500 MHz,  $\text{CDCl}_3$ )  $\delta$  7.39 – 7.33 (m, 5H), 7.32 – 7.28 (m, 1H), 6.94 (d,  $J = 8.3$  Hz, 1H), 6.90 (ddd,  $J = 9.4, 6.4, 1.0$  Hz, 1H), 4.68 (dt,  $J = 9.6, 4.6$  Hz, 1H), 4.61 (q,  $J = 12.1$  Hz, 2H), 3.72 – 3.63 (m, 2H), 3.62 – 3.50 (m, 2H), 3.29 (dt,  $J = 14.5, 7.4$  Hz, 1H), 3.21 – 3.15 (m, 1H), 1.64 – 1.54 (m, 2H), 1.39 – 1.31 (m, 2H), 0.92 (t,  $J = 7.4$  Hz, 3H);  $^{13}\text{C}$  NMR (126 MHz,  $\text{CDCl}_3$ )  $\delta$  158.2 (d,  $^1J_{\text{C-F}} = 337.1$  Hz), 154.3 (d,  $^3J_{\text{C-F}} = 2.5$  Hz), 135.3, 130.99, 126.2, 125.5, 125.3, 115.6, 110.0, 109.7, 79.0, 71.2, 67.6, 48.0, 47.2, 28.3, 17.3, 11.6; HRMS calculated for  $\text{C}_{20}\text{H}_{24}\text{FNO}_4\text{SNa}$  ( $\text{M}+\text{Na}$ ) $^+$  416.1308; found 416.1303 (FAB).

#### 4-(But-3-enyl)-2-butyl-9-fluoro-1,2-benzoxathiazepine-1,1-dioxide (2).

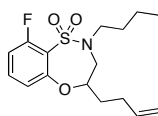

Using general procedure **B**, sultam **2** was produced in 71% (114 mg, 0.35 mmol) as a colorless liquid. FTIR (neat): 2952, 1604, 1453, 1351, 1160  $\text{cm}^{-1}$ ;  $^1\text{H}$  NMR (500 MHz,  $\text{CDCl}_3$ )  $\delta$  7.38 – 7.32 (m, 1H), 6.92 – 6.84 (m, 2H), 5.81 – 5.71 (m, 1H), 5.02 – 4.94 (m, 2H), 4.52 – 4.45 (m, 1H), 3.57 (dd,  $J = 14.2, 3.6$  Hz, 1H), 3.34 – 3.26 (m, 2H), 3.15 (ddd,  $J = 13.9, 7.8, 6.1$  Hz, 1H), 2.38 – 2.29 (m, 1H), 2.18 (ddt,  $J = 14.4, 8.3, 7.2$  Hz, 1H), 1.87 – 1.78 (m, 1H), 1.67 – 1.60 (m, 1H), 1.60 – 1.51 (m, 2H), 1.38 – 1.29 (m, 2H), 0.90 (t,  $J = 7.4$  Hz, 3H);  $^{13}\text{C}$  NMR (126 MHz,  $\text{CDCl}_3$ )  $\delta$  160.0 (d,  $^1J_{\text{C-F}} = 250.1$  Hz), 157.0 (d,  $^3J_{\text{C-F}} = 2.5$  Hz), 137.0, 133.2, 122.73, 117.4, 112.0, 111.8, 82.0, 53.5, 50.5, 32.8, 31.0, 29.4, 19.6, 13.4; HRMS calculated for  $\text{C}_{16}\text{H}_{22}\text{FNO}_3\text{SNa}$  ( $\text{M}+\text{Na}$ ) $^+$  350.1202; found 350.1198 (FAB).

#### 9-Fluoro-2-(4-fluorophenethyl)-4-(phenoxyethyl)-1,2-benzoxathiazepine-1,1-dioxide (3).

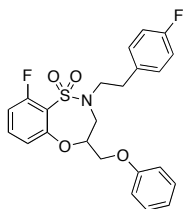

Using general procedure **B**, sultam **3** was produced in 71% (156 mg, 0.35 mmol) as a colorless liquid. FTIR (neat): 2943, 1568, 1464, 1358, 1168  $\text{cm}^{-1}$ ;  $^1\text{H}$  NMR (500 MHz,  $\text{CDCl}_3$ )  $\delta$  7.39 – 7.34 (m, 2H), 7.34 – 7.30 (m, 2H), 7.21 – 7.17 (m, 2H), 7.03 – 6.94 (m, 4H), 6.93 – 6.89 (m, 2H), 4.83 (ddd,  $J = 11.1, 9.2, 4.1$  Hz, 1H), 4.19 – 4.14 (m, 1H), 4.10 (dd,  $J = 10.5, 4.0$  Hz, 1H), 3.64 (dd,  $J = 14.3, 3.9$  Hz, 1H), 3.58 (dt,  $J = 14.5, 7.3$  Hz, 1H), 3.49 (dd,  $J = 14.6, 11.8$  Hz, 1H), 3.42 (dd,  $J = 14.4, 7.3$  Hz, 1H), 2.95 (t,  $J = 7.4$ , 2H);  $^{13}\text{C}$  NMR (126 MHz,  $\text{CDCl}_3$ )  $\delta$  162.2 (d,  $^1J_{\text{C-F}} = 171.0$  Hz), 160.1 (d,  $^1J_{\text{C-F}} = 256.6$  Hz), 158.1, 156.4 (d,  $^3J_{\text{C-F}} = 2.5$  Hz), 133.5, 130.4, 129.6, 121.7, 117.8, 115.5, 115.3, 114.6, 112.6, 112.4, 80.7, 67.8, 53.0, 50.8, 35.3; HRMS calculated for  $\text{C}_{23}\text{H}_{21}\text{F}_2\text{NO}_4\text{SNa}$  ( $\text{M}+\text{Na}$ ) $^+$  468.1057; found 468.1052 (FAB).

#### 4-(But-3-enyl)-9-fluoro-2-(4-methoxybenzyl)-1,2-benzoxathiazepine-1,1-dioxide (4).

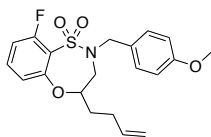

Using general procedure **B**, sultam **4** was produced in 69% (133 mg, 0.34 mmol) as a clear oil. FTIR (neat) 2955, 1465, 1352, 1254, 1160  $\text{cm}^{-1}$ ;  $^1\text{H}$  NMR (500 MHz,  $\text{CDCl}_3$ )  $\delta$  = 7.40 (dd,  $J$  = 8.5, 5.4 Hz, 1H), 7.30 – 7.26 (m, 2H), 6.97 – 6.92 (m, 2H), 6.91 – 6.87 (m, 2H), 5.79 – 5.70 (m, 1H), 5.01 – 4.97 (m, 1H), 4.97 – 4.95 (m, 1H), 4.58 – 4.49 (m, 2H), 4.20 (d,  $J$  = 14.2 Hz, 1H), 3.81 (s, 3H), 3.39 (dd,  $J$  = 14.4, 3.6 Hz, 1H), 3.22 (dd,  $J$  = 14.3, 11.5 Hz, 1H), 2.36 – 2.27 (m, 1H), 2.17 (dq,  $J$  = 14.5, 7.1, 1.1 Hz, 1H), 1.79 (dtd,  $J$  = 14.2, 8.8, 5.4 Hz, 1H), 1.60 – 1.52 (m, 1H);  $^{13}\text{C}$  NMR (126 MHz,  $\text{CDCl}_3$ )  $\delta$  = 160.3 (d,  $^1J_{\text{C-F}}$  = 257.8 Hz), 159.5, 157.1 (d,  $^3J_{\text{C-F}}$  = 2.4 Hz), 136.8, 133.5 (d,  $^3J_{\text{C-F}}$  = 10.6 Hz), 129.89, 127.32, 117.6, 115.97, 114.16, 112.2 (d,  $^2J_{\text{C-F}}$  = 22.9 Hz), 82.3, 55.3, 53.7, 51.5, 32.8, 29.6; HRMS calculated for  $\text{C}_{20}\text{H}_{22}\text{FNO}_4\text{SNa}$  ( $\text{M} + \text{Na}^+$ ) 414.1152; found 414.1152 (TOF MS  $\text{ES}^+$ ).

#### ((*R*)-9-Fluoro-2-((*R*)-1-phenylethyl)-1,2-benzoxathiazepine-1,1-dioxide)methyl butyrate (5).

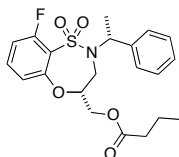

Using general procedure **B**, sultam **5** was produced in 76% (160 mg, 0.38 mmol) as a clear oil. FTIR (neat) 2949, 1746, 1463, 1250, 1168  $\text{cm}^{-1}$ ;  $^1\text{H}$  NMR (500 MHz,  $\text{CDCl}_3$ )  $\delta$  = 7.39 – 7.32 (m, 5H), 7.31 – 7.27 (m, 1H), 6.94 (ddd,  $J$  = 9.5, 6.0, 1.1 Hz, 1H), 6.88 – 6.85 (m, 1H), 5.49 (q,  $J$  = 7.0 Hz, 1H), 4.57 – 4.49 (m, 1H), 4.19 – 4.12 (m, 2H), 3.26 (dd,  $J$  = 14.0, 4.0 Hz, 1H), 3.19 (dd,  $J$  = 13.9, 11.6, 1H), 2.30 (dd,  $J$  = 7.7, 7.2 Hz, 2H), 1.68 – 1.60 (m, 2H), 1.51 (d,  $J$  = 7.0 Hz, 3H), 0.93 (t,  $J$  = 6.9 Hz, 3H);  $^{13}\text{C}$  NMR (126 MHz,  $\text{CDCl}_3$ )  $\delta$  = 172.94, 169.1 (d,  $^1J_{\text{C-F}}$  = 260.5 Hz), 156.5, 139.2, 133.1 (d,  $^2J_{\text{C-F}}$  = 11.4 Hz), 128.7, 128.1, 127.5, 124.5, 124.3 (d,  $^3J_{\text{C-F}}$  = 15.2 Hz), 117.3, 112.1 (d,  $^2J_{\text{C-F}}$  = 22.8 Hz), 79.3, 63.3, 56.9, 44.9, 35.9, 18.3, 16.2, 13.7; HRMS calculated for  $\text{C}_{21}\text{H}_{24}\text{FNO}_5\text{SNa}$  ( $\text{M} + \text{Na}^+$ ) 444.1257; found 444.1260 (TOF MS  $\text{ES}^+$ );  $[\alpha]_{\text{D}}^{25}$  = -8.3 ( $c$  = 2.0,  $\text{CHCl}_3$ ).  $[\alpha]_{\text{D}}^{20}$  + 35.0 ( $c$  = 0.60,  $\text{CHCl}_3$ )

#### 4-(Benzyloxymethyl)-7-bromo-2-butyl-1,2-benzoxathiazepine-1,1-dioxide (6).

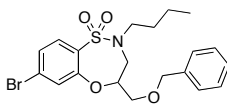

Using general procedure **B**, sultam **6** was produced in 65% (145 mg, 0.32 mmol) as a colorless liquid. FTIR (neat): 2933, 1604, 1465, 1365, 1161  $\text{cm}^{-1}$ ;  $^1\text{H}$  NMR (500 MHz,  $\text{CDCl}_3$ )  $\delta$  7.31 – 7.25 (m, 1H), 7.25 – 7.20 (m, 2H), 6.94 – 6.89 (m, 1H), 6.87 – 6.82 (m, 4H), 4.77 (dt,  $J$  = 9.5, 4.1 Hz, 2H), 4.15 – 4.10 (m, 1H), 4.05 (dd,  $J$  = 10.5, 4.0 Hz, 1H), 3.66 – 3.60 (m, 2H), 3.60 – 3.53 (m, 1H), 3.28 – 3.21 (m, 1H), 3.18 – 3.12 (m, 1H), 1.58 – 1.50 (m, 2H), 1.33 – 1.25 (m, 2H), 0.85 (t,  $J$  = 7.4 Hz, 3H);  $^{13}\text{C}$  NMR (126 MHz,  $\text{CDCl}_3$ )  $\delta$  155.4, 137.4, 133.3, 130.3, 128.6, 128.0, 127.7, 127.5, 127.5, 126.7, 78.2, 74.03, 70.4, 50.77, 48.30, 31.0, 19.9, 13.9; HRMS calculated for  $\text{C}_{20}\text{H}_{24}\text{BrNO}_4\text{SNa}$  ( $\text{M} + \text{Na}^+$ ) 476.0507; found 476.0502 (FAB).

## 2-Allyl-4-(butoxymethyl)-8-chloro-1,2-benzoxathiazepine-1,1-dioxide (7).

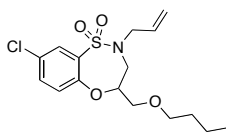

Using general procedure **B**, sultam **7** was produced in 74% (133 mg, 0.37 mmol) as a clear oil. FTIR (neat) 2956, 1465, 1346, 1255, 1168  $\text{cm}^{-1}$ ;  $^1\text{H}$  NMR (500 MHz,  $\text{CDCl}_3$ )  $\delta$  = 7.77 (d,  $J$  = 2.6 Hz, 1H), 7.42 – 7.39 (dd,  $J$  = 8.5, 2.7 Hz, 1H), 7.11 (d,  $J$  = 8.6 Hz, 1H), 5.77 (dddd,  $J$  = 17.2, 10.1, 7.2, 5.1 Hz, 1H), 5.28 – 5.21 (m, 2H), 4.17 – 4.10 (m, 1H), 3.98 – 3.93 (m, 1H), 3.89 (ddd,  $J$  = 15.2, 10.7, 0.8 Hz, 1H), 3.68 (dd,  $J$  = 10.4, 5.7 Hz, 1H), 3.53 (dd,  $J$  = 10.4, 5.6 Hz, 1H), 3.48 (ddd,  $J$  = 6.5, 4.0, 2.4 Hz, 2H), 3.40 (ddd,  $J$  = 14.2, 9.8, 4.5 Hz, 2H), 1.55 (ddt,  $J$  = 13.0, 8.5, 3.6 Hz, 2H), 1.36 (dp,  $J$  = 9.2, 7.4 Hz, 2H), 0.91 (t,  $J$  = 7.4 Hz, 3H);  $^{13}\text{C}$  NMR (126 MHz,  $\text{CDCl}_3$ )  $\delta$  = 153.6, 135.5, 133.9, 132.2, 129.7, 128.5, 124.9, 119.5, 77.9, 71.6, 70.7, 50.9, 49.6, 31.6, 19.2, 13.9; HRMS calculated for  $\text{C}_{16}\text{H}_{22}\text{ClNO}_4\text{SNa}$  ( $\text{M} + \text{Na}^+$ ) 382.0856; found 382.0857 (TOF MS  $\text{ES}^+$ ).

## 7-Bromo-2-butyl-4-(phenoxymethyl)-1,2-benzoxathiazepine-1,1-dioxide (8).

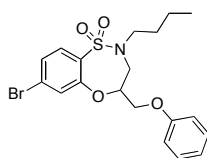

Using general procedure **B**, sultam **8** was produced in 78% (171 mg, 0.39 mmol) as an clear oil. FTIR (neat) 2958, 1577, 1496, 1454, 1344, 1168  $\text{cm}^{-1}$ ;  $^1\text{H}$  NMR (500 MHz,  $\text{CDCl}_3$ )  $\delta$  = 7.70 – 7.67 (m, 1H), 7.37 (dd,  $J$  = 7.6, 1.6 Hz, 2H), 7.34 – 7.30 (m, 2H), 7.03 – 6.99 (m, 1H), 6.94 (dt,  $J$  = 9.2, 1.7 Hz, 2H), 4.40 (ddd,  $J$  = 10.6, 5.5, 4.2 Hz, 1H), 4.32 – 4.25 (m, 1H), 4.12 – 4.02 (m, 2H), 3.50 (dd,  $J$  = 15.2, 1.7 Hz, 1H), 3.29 – 3.21 (m, 1H), 2.85 – 2.75 (m, 1H), 1.64 – 1.55 (m, 2H), 1.41 – 1.31 (m, 2H), 0.93 (t,  $J$  = 7.4 Hz, 3H);  $^{13}\text{C}$  NMR (126 MHz,  $\text{CDCl}_3$ )  $\delta$  = 158.1, 155.3, 133.4, 130.1, 129.7, 127.8, 127.6, 126.8, 121.7, 114.7, 67.8, 50.3, 48.0, 30.7, 19.6, 13.7; HRMS calculated for  $\text{C}_{19}\text{H}_{23}\text{BrNO}_4\text{S}$  ( $\text{M} + \text{H}^+$ ) 440.0531; found 440.0534 (TOF MS  $\text{ES}^+$ ).

## 4-(Butoxymethyl)-8-chloro-2-(2-methoxybenzyl)-1,2-benzoxathiazepine-1,1-dioxide (9).

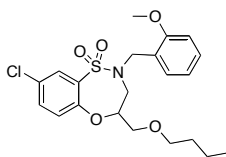

Using general procedure **B**, sultam **9** was produced in 74% (162mg, 0.37 mmol) as an clear oil. FTIR (neat) 2956, 1463, 1346, 1253, 1166  $\text{cm}^{-1}$ ;  $^1\text{H}$  NMR (500 MHz,  $\text{CDCl}_3$ )  $\delta$  = 7.85 (d,  $J$  = 2.6 Hz, 1H), 7.44 – 7.39 (m, 2H), 7.30 – 7.26 (m, 1H), 7.13 (d,  $J$  = 8.6 Hz, 1H), 6.96 (td,  $J$  = 7.5, 1.0 Hz, 1H), 6.86 – 6.82 (m, 1H), 4.40 (d,  $J$  = 14.7 Hz, 1H), 4.16 (dd,  $J$  = 5.3, 12.3 Hz, 2H), 3.91 (ddt,  $J$  = 19.5, 10.0, 5.0 Hz, 1H), 3.75 (s, 3H), 3.65 (dt,  $J$  = 12.8, 6.4 Hz, 1H), 3.47 (m, 3H), 3.32 – 3.26 (m, 1H), 1.54 (dq,  $J$  = 12.2, 6.7 Hz, 2H), 1.40 – 1.28 (m, 2H), 0.91 (t,  $J$  = 7.4 Hz, 3H);  $^{13}\text{C}$  NMR (126 MHz,  $\text{CDCl}_3$ )  $\delta$  = 157.3, 153.8, 135.9, 133.9, 130.4, 129.6, 129.4, 128.7, 124.9, 123.3, 120.8, 110.3, 77.5, 71.6, 70.9, 55.2, 50.2, 45.8, 31.7, 19.2, 13.9; HRMS calculated for  $\text{C}_{21}\text{H}_{26}\text{ClNO}_5\text{SNa}$  ( $\text{M} + \text{Na}^+$ ) 462.1118; found 462.1106 (TOF MS  $\text{ES}^+$ ).

**(R)-(2-Allyl-9-fluoro-1,2-benzoxathiazepine-1,1-dioxide)methanol (11).**

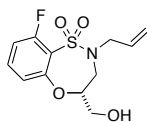

Using general procedure **B**, sultam **11** was produced in 70% (100mg, 0.35 mmol) as a clear oil. FTIR (neat) 3280, 1720, 1602, 1450, 1163  $\text{cm}^{-1}$ :  $^1\text{H}$  NMR (500 MHz,  $\text{CDCl}_3$ )  $\delta$  = 7.38 (td,  $J$  = 8.3, 6.0 Hz, 1H), 6.93 (dd,  $J$  = 13.0, 4.7 Hz, 2H), 5.80 (dddd,  $J$  = 17.0, 10.1, 6.8, 5.4 Hz, 1H), 5.27 (dddd,  $J$  = 19.0, 10.1, 2.6, 1.3 Hz, 2H), 4.60 (ddt,  $J$  = 11.2, 5.2, 3.9 Hz, 1H), 3.97 (dd,  $J$  = 15.1, 5.3 Hz, 1H), 3.83 (ddd,  $J$  = 12.3, 6.0, 3.3 Hz, 1H), 3.78 (dd,  $J$  = 15.1, 6.8 Hz, 1H), 3.73 (dt,  $J$  = 12.1, 5.9 Hz, 1H), 3.55 (ddd,  $J$  = 18.5, 14.4, 7.7 Hz, 2H), 2.19 (t,  $J$  = 6.3 Hz, 1H);  $^{13}\text{C}$  NMR (126 MHz,  $\text{CDCl}_3$ )  $\delta$  = 160.3 (d,  $^1J_{\text{C-F}}$  = 260.2 Hz), 156.3, 133.5 (d,  $^2J_{\text{C-F}}$  = 15.5 Hz), 132.41, 122.0 (d,  $^2J_{\text{C-F}}$  = 15.0 Hz), 119.43, 117.7, 112.5 (d,  $^2J_{\text{C-F}}$  = 23.2 Hz), 82.8, 62.8, 53.1, 47.9; HRMS calculated for  $\text{C}_{12}\text{H}_{15}\text{FNO}_4\text{SNa}$  ( $\text{M} + \text{H}^+$ ) 288.0706; found 288.0703 (TOF MS  $\text{ES}^+$ );  $[\alpha]_{\text{D}}^{25} = -19.0$  ( $c = 1.2$ ,  $\text{CHCl}_3$ )

**(R)-(2-Allyl-9-fluoro-1,2-benzoxathiazepine-1,1-dioxide)methyl 3-methylbenzoate (12).**

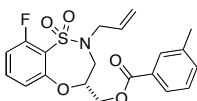

Using general procedure **C**, sultam **12** was produced in 94% (114 mg, 0.28 mmol) as a clear oil. FTIR (neat) 1722, 1461, 1355, 1276, 1163  $\text{cm}^{-1}$ :  $^1\text{H}$  NMR (500 MHz,  $\text{CDCl}_3$ )  $\delta$  7.64 – 7.61 (m, 1H), 7.55 (dd,  $J$  = 2.6, 1.5 Hz, 1H), 7.39 – 7.35 (m, 2H), 7.14 (ddd,  $J$  = 8.3, 2.7, 1.0 Hz, 1H), 6.98 – 6.91 (m, 2H), 5.84 (dddd,  $J$  = 17.1, 10.1, 7.0, 5.4 Hz, 1H), 5.32 (ddd,  $J$  = 17.1, 2.7, 1.3 Hz, 1H), 5.28 (dd,  $J$  = 10.1, 1.2 Hz, 1H), 4.89 (ddt,  $J$  = 7.6, 6.3, 3.8 Hz, 1H), 4.50 (ddd,  $J$  = 15.8, 12.1, 5.0 Hz, 2H), 4.04 (dd,  $J$  = 14.9, 5.3 Hz, 1H), 3.85 (s, 3H), 3.86 – 3.80 (m, 1H), 3.70 – 3.55 (m, 2H);  $^{13}\text{C}$  NMR (126 MHz,  $\text{CDCl}_3$ )  $\delta$  165.8, 160.3 (d,  $^1J_{\text{C-F}}$  = 257.9 Hz), 159.66, 156.19, 133.7 (d,  $^3J_{\text{C-F}}$  = 13.2 Hz), 132.4, 130.6, 129.6, 122.8 (d,  $^3J_{\text{C-F}}$  = 14.4 Hz), 121.9, 119.8, 117.8, 114.3, 112.7 (d,  $^2J_{\text{C-F}}$  = 23.8 Hz), 80.2, 64.1, 55.4, 53.3, 48.1. HRMS calculated for  $\text{C}_{20}\text{H}_{20}\text{FNO}_6\text{SNa}$  ( $\text{M} + \text{Na}^+$ ) 444.0893; found 444.0883 (TOF MS  $\text{ES}^+$ );  $[\alpha]_{\text{D}}^{25} = -6.8$  ( $c = 1.5$ ,  $\text{CHCl}_3$ )

**(R)-(2-Allyl-9-fluoro-1,2-benzoxathiazepine-1,1-dioxide)methyl 3-methoxybenzoate (13).**

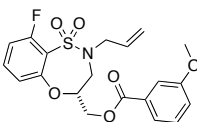

Using general procedure **C**, sultam **13** was produced in 94% (118mg, 0.28 mmol) as a clear oil. FTIR (neat) 1724, 1602, 1463, 1276, 1163  $\text{cm}^{-1}$ :  $^1\text{H}$  NMR (500 MHz,  $\text{CDCl}_3$ )  $\delta$  = 7.83 (dd,  $J$  = 6.3, 5.2 Hz, 2H), 7.42 – 7.32 (m, 3H), 6.99 – 6.90 (m, 2H), 5.84 (dddd,  $J$  = 17.1, 10.1, 7.1, 5.4 Hz, 1H), 5.34 – 5.25 (m, 2H), 4.89 (ddt,  $J$  = 7.8, 6.1, 3.9 Hz, 1H), 4.54 – 4.45 (ddd,  $J$  = 18.8, 12.2, 6.7 Hz, 2H), 4.05 (dd,  $J$  = 15.1, 5.6 Hz, 1H), 3.84 (dd,  $J$  = 14.4, 7.1 Hz, 1H), 3.68 (dd,  $J$  = 14.4, 4.0 Hz, 1H), 3.59 (dd,  $J$  = 14.4, 11.4 Hz, 1H), 2.41 (s, 3H);  $^{13}\text{C}$  NMR (126 MHz,  $\text{CDCl}_3$ )  $\delta$  = 166.16, 160.4 (d,  $^1J_{\text{C-F}}$  = 254.4 Hz), 156.2, 138.4, 134.3, 133.71 (d,  $^3J_{\text{C-F}}$  = 10.7 Hz), 132.48, 130.21, 129.22, 128.45, 126.80, 122.8 (d,  $^2J_{\text{C-F}}$  = 15.9 Hz), 119.71, 117.8, 112.7 (d,  $^2J_{\text{C-F}}$  = 20.4 Hz), 80.26, 63.96, 53.29, 48.06, 21.28; HRMS calculated for  $\text{C}_{20}\text{H}_{20}\text{FNO}_6\text{SNa}$  ( $\text{M} + \text{Na}^+$ ) 444.0893; found 444.0895 (TOF MS  $\text{ES}^+$ );  $[\alpha]_{\text{D}}^{25} = -11.8$  ( $c = 1.6$ ,  $\text{CHCl}_3$ )

**(R)-(2-Allyl-9-fluoro-1,2-benzoxathiazepine-1,1-dioxide)methyl 3,4-dimethylbenzoate (14).**

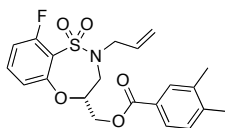

Using general procedure C, sultam **14** was produced in 96% (117 mg, 0.28 mmol) as a clear oil. FTIR (neat) 1718, 1610, 1460, 1248, 1159  $\text{cm}^{-1}$ ;  $^1\text{H}$  NMR (500 MHz,  $\text{CDCl}_3$ )  $\delta$  = 7.79 (s, 1H), 7.75 (dd,  $J$  = 7.8, 1.7 Hz, 1H), 7.37 (td,  $J$  = 8.3, 5.9 Hz, 1H), 7.21 (d,  $J$  = 7.9 Hz, 1H), 6.98 – 6.91 (m, 2H), 5.84 (dddd,  $J$  = 17.1, 10.1, 7.0, 5.4 Hz, 1H), 5.30 (dddd,  $J$  = 16.6, 11.2, 2.5, 1.2 Hz, 2H), 4.92 – 4.84 (m, 1H), 4.48 (ddd,  $J$  = 15.8, 12.0, 5.0 Hz, 2H), 4.04 (dd,  $J$  = 14.9, 5.3 Hz, 1H), 3.83 (dd,  $J$  = 14.9, 7.1 Hz, 1H), 3.63 (ddd,  $J$  = 25.8, 14.4, 7.7 Hz, 2H), 2.32 (d,  $J$  = 4.4 Hz, 3H), 2.31 (s, 3H);  $^{13}\text{C}$  NMR (126 MHz,  $\text{CDCl}_3$ )  $\delta$  = 166.23, 160.6 (d,  $^1J_{\text{C-F}}$  = 259.8 Hz), 156.23, 143.0, 136.9, 133.6 (d,  $^3J_{\text{C-F}}$  = 12.8 Hz), 132.48, 130.71, 129.83, 127.25, 126.83, 122.72 (d,  $^2J_{\text{C-F}}$  = 12.8 Hz), 119.71, 117.9, 112.7 (d,  $^2J_{\text{C-F}}$  = 25.6 Hz), 80.3, 63.8, 53.3, 48.1, 20.1, 19.7; HRMS calculated for  $\text{C}_{21}\text{H}_{22}\text{FNO}_5\text{SNa}$  ( $\text{M} + \text{Na}^+$ ) 442.1101; found 442.1108 (TOF MS  $\text{ES}^+$ );  $[\alpha]_{\text{D}}^{25} = -4.8$  ( $c$  = 1.9,  $\text{CHCl}_3$ ).

**(R)-(2-Allyl-9-fluoro-1,2-benzoxathiazepine-1,1-dioxide)methyl 2-cyanoacetate (15).**

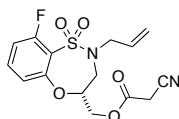

Using general procedure C, sultam **15** was produced in 89% (92.1 mg, 0.26 mmol) as a clear oil. FTIR (neat) 2258, 1746, 1602, 1464, 1160  $\text{cm}^{-1}$ ;  $^1\text{H}$  NMR (500 MHz,  $\text{CDCl}_3$ )  $\delta$  = 7.41 (td,  $J$  = 8.3, 5.9 Hz, 1H), 6.99 – 6.95 (m, 2H), 5.81 (dddd,  $J$  = 17.2, 10.2, 6.9, 5.4 Hz, 1H), 5.31 (dddd,  $J$  = 17.9, 10.1, 2.6, 1.3 Hz, 2H), 4.77 (ddd,  $J$  = 14.8, 6.9, 3.6 Hz, 1H), 4.38 (qd,  $J$  = 12.1, 4.9 Hz, 2H), 4.01 (dd,  $J$  = 15.0, 5.3 Hz, 1H), 3.79 (dd,  $J$  = 15.0, 7.0 Hz, 1H), 3.59 (dd,  $J$  = 14.3, 4.0 Hz, 1H), 3.54 (s, 2H), 3.49 (dd,  $J$  = 14.3, 11.5 Hz, 1H);  $^{13}\text{C}$  NMR (126 MHz,  $\text{CDCl}_3$ )  $\delta$  = 162.47, 160.0 (d,  $^2J_{\text{C-F}}$  = 258.6 Hz), 155.8 (d,  $^3J_{\text{C-F}}$  = 3.3 Hz), 133.8 (d,  $^2J_{\text{C-F}}$  = 9.4 Hz), 132.24, 122.7 (d,  $^2J_{\text{C-F}}$  = 14.7 Hz), 119.83, 117.8 (d,  $^3J_{\text{C-F}}$  = 4.3 Hz), 112.9 (d,  $^2J_{\text{C-F}}$  = 21.0 Hz), 112.5, 79.4, 65.5, 53.2, 47.8, 24.6; HRMS calculated for  $\text{C}_{15}\text{H}_{15}\text{FN}_2\text{O}_5\text{SNa}$  ( $\text{M} + \text{Na}^+$ ) 377.0583; found 377.0572 (TOF MS  $\text{ES}^+$ );  $[\alpha]_{\text{D}}^{25} = -19.0$  ( $c$  = 1.4,  $\text{CHCl}_3$ ).

**(R)-(2-Allyl-9-fluoro-1,2-benzoxathiazepine-1,1-dioxide)methyl-2-(phenylthio)acetate (16).**

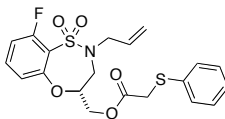

Using general procedure C, sultam **16** was produced in 98% (126mg, 0.29 mmol) as a clear oil. FTIR (neat) 1738, 1618, 1463, 1163  $\text{cm}^{-1}$ ;  $^1\text{H}$  NMR (500 MHz,  $\text{CDCl}_3$ )  $\delta$  = 7.38 (ddd,  $J$  = 3.5, 2.9, 1.2 Hz, 2H), 7.37 – 7.32 (m, 1H), 7.30 – 7.26 (m, 2H), 7.24 – 7.20 (m, 1H), 6.95 (ddd,  $J$  = 9.5, 6.1, 1.1 Hz, 1H), 6.87 – 6.84 (m, 1H), 5.79 (dddd,  $J$  = 17.1, 10.1, 7.0, 5.3 Hz, 1H), 5.32 – 5.24 (m, 2H), 4.68 (ddt,  $J$  = 11.4, 5.5, 4.1 Hz, 1H), 4.27 (dd,  $J$  = 4.9, 2.3 Hz, 2H), 3.98 (dd,  $J$  = 15.0, 5.2 Hz, 1H), 3.77 – 3.71 (m, 1H), 3.67 (s, 2H), 3.52 (dd,  $J$  = 14.3, 4.0 Hz, 1H), 3.41 (dd,  $J$  = 14.3, 11.5 Hz, 1H);  $^{13}\text{C}$  NMR (126 MHz,  $\text{CDCl}_3$ )  $\delta$  = 169.3, 160.9 (d,  $^2J_{\text{C-F}}$  = 259.4 Hz), 156.0, 134.50, 133.6 (d,  $^2J_{\text{C-F}}$  = 11.3 Hz), 132.35, 130.08, 129.19, 127.31, 122.7 (d,  $^2J_{\text{C-F}}$  = 13.5 Hz), 119.60, 117.8 (d,  $^3J_{\text{C-F}}$  = 4.5 Hz), 112.7 (d,  $^2J_{\text{C-F}}$  = 24.5 Hz), 79.9, 64.4, 53.2, 48.1, 36.5; HRMS calculated for  $\text{C}_{20}\text{H}_{20}\text{FNO}_5\text{S}_2\text{Na}$  ( $\text{M} + \text{Na}^+$ ) 460.0665; found 460.0677 (TOF MS  $\text{ES}^+$ );  $[\alpha]_{\text{D}}^{25} = -6.9$  ( $c$  = 2.2,  $\text{CHCl}_3$ ).



## 2-Allyl-4-(benzyloxymethyl)-1,4-oxathiazepine-1,1-dioxide (17).

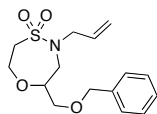

Using general procedure **D**, sultam **17** was produced in 65% (99 mg, 0.32 mmol) as a clear oil. FTIR (neat) 1508, 1334, 1232, 1130, 1033  $\text{cm}^{-1}$ ;  $^1\text{H}$  NMR (500 MHz,  $\text{CDCl}_3$ )  $\delta$  = 7.37 – 7.27 (m, 5H), 5.85 – 5.75 (dddd,  $J$  = 16.2, 10.2, 6.1, 6.1 Hz, 1H), 5.27 (dddd,  $J$  = 17.1, 1.5, 1.5, 1.4 Hz, 1H), 5.23 (dddd,  $J$  = 10.2, 1.4, 1.3, 1.2 Hz, 1H), 4.54 (dd,  $J$  = 12.5, 4.6 Hz, 2H), 4.26 – 4.18 (m, 2H), 3.96 – 3.85 (m, 2H), 3.81 (ddd,  $J$  = 13.7, 8.7, 3.0 Hz, 1H), 3.47 – 3.45 (m, 2H), 3.38 – 3.25 (m, 4H);  $^{13}\text{C}$  NMR (126 MHz,  $\text{CDCl}_3$ )  $\delta$  = 137.6, 133.0, 128.5, 127.9, 127.7, 118.9, 78.9, 73.5, 70.7, 63.4, 55.3, 51.7, 45.6; HRMS calculated for  $\text{C}_{15}\text{H}_{21}\text{NO}_4\text{SNa}$  ( $\text{M} + \text{Na}^+$ ) 334.1089; found 334.1100 (TOF MS  $\text{ES}^+$ ).

## (S)-2-Allyl-4-(benzyloxymethyl)-1,4-oxathiazepine-1,1-dioxide (18).

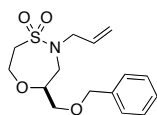

Using general procedure **D**, sultam **18** was produced in 63% (96 mg, 0.31 mmol) as a clear oil. FTIR (neat) 1334, 1143, 1112  $\text{cm}^{-1}$ ;  $^1\text{H}$  NMR (400 MHz,  $\text{CDCl}_3$ )  $\delta$  = 7.39 – 7.29 (m, 5H), 5.86 – 5.74 (m, 1H), 5.31 – 5.22 (m, 2H), 4.55 (dd,  $J$  = 15.6, 12.2 Hz, 2H), 4.28 – 4.18 (m, 2H), 3.92 (dd,  $J$  = 9.1, 4.1 Hz, 2H), 3.86–3.78 (m, 1H), 3.47 (d,  $J$  = 4.9 Hz, 1H), 3.39 – 3.25 (m, 5H);  $^{13}\text{C}$  NMR (126 MHz,  $\text{CDCl}_3$ )  $\delta$  = 137.6, 133.0, 128.5, 127.9, 127.7, 119.0, 78.9, 73.5, 70.7, 63.4, 55.3, 51.8, 45.6; HRMS calculated for  $\text{C}_{15}\text{H}_{21}\text{NO}_4\text{SNa}$  ( $\text{M} + \text{Na}^+$ ) 334.1089; found 334.1090 (TOF MS  $\text{ES}^+$ );  $[\alpha]_{\text{D}}^{25} = +11.8$  ( $c = 1.8$ ,  $\text{CHCl}_3$ ).

## 2-Butyl-4-(benzyloxymethyl)-1,4-oxathiazepine-1,1-dioxide (19).

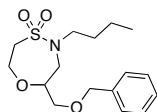

Using general procedure **D**, sultam **19** was produced in 58% (90 mg, 0.29 mmol) as a clear oil. FTIR (neat) 1340, 1138, 1120  $\text{cm}^{-1}$ ;  $^1\text{H}$  NMR (500 MHz,  $\text{CDCl}_3$ )  $\delta$  = 7.37 – 7.27 (m, 5H), 4.58 – 4.52 (dd,  $J$  = 12.6, 5.3 Hz, 2H), 4.24 – 4.18 (m, 2H), 3.78 (dddd,  $J$  = 12.7, 9.3, 3.2, 3.0 Hz, 1H), 3.48 (dd,  $J$  = 0.9, 4.8, 2H), 3.36 – 3.31 (m, 2H), 3.28–3.21 (m, 3H), 1.57 – 1.50 (m, 3H), 1.38 – 1.29 (m, 2H), 0.92 (t,  $J$  = 7.4, 3H);  $^{13}\text{C}$  NMR (126 MHz,  $\text{CDCl}_3$ )  $\delta$  = 137.7, 128.5, 127.7, 78.9, 73.5, 70.8, 63.6, 55.0, 48.8, 46.1, 30.4, 19.6, 13.7; HRMS calculated for  $\text{C}_{16}\text{H}_{25}\text{NOSNa}$  ( $\text{M} + \text{Na}^+$ ) 350.1402; found 350.1408 (TOF MS  $\text{ES}^+$ ).

## 2-Benzyl-4-((4-methoxyphenoxy)methyl)-1,4-oxathiazepine-1,1-dioxide (20).

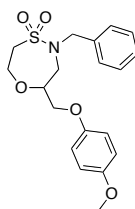

Using general procedure **D**, sultam **20** was produced in 62% (117 mg, 0.31 mmol) as a clear oil. FTIR (neat) 1508, 1336, 1230, 1145  $\text{cm}^{-1}$ ;  $^1\text{H}$  NMR (500 MHz,  $\text{CDCl}_3$ )  $\delta$  = 7.40 – 7.29 (m, 5H), 6.80 (d,  $J$  = 2.8 Hz, 4H), 4.52 (dd,  $J$  = 14.5, 2.6 Hz, 2H), 4.40 (td,  $J$  = 9.9, 5.0 Hz, 1H), 4.33 (ddd,  $J$  = 13.7, 5.3, 3.6 Hz, 1H), 3.94 – 3.88 (m, 1H), 3.87 (dd,  $J$  = 4.6, 2.1 Hz, 2H), 3.75 (s, 3H), 3.46 (ddd,  $J$  = 14.4, 8.7, 3.6 Hz, 1H), 3.43 – 3.37 (m, 2H), 3.23 (dd,  $J$  = 15.1, 5.3 Hz, 1H);  $^{13}\text{C}$  NMR (126 MHz,  $\text{CDCl}_3$ )  $\delta$  = 154.2, 152.4, 135.7, 128.8, 128.3, 128.1, 115.6, 114.7, 78.3, 69.4, 63.6, 55.7, 55.3, 52.6, 45.3; HRMS calculated for  $\text{C}_{19}\text{H}_{24}\text{NO}_5\text{S}$  ( $\text{M} + \text{H}^+$ ) 378.1375; found 378.1376 (TOF MS  $\text{ES}^+$ ).

## 2-Allyl-4-((4-methoxyphenoxy)methyl)-1,4-oxathiazepine-1,1-dioxide (21).

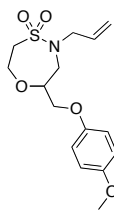

Using general procedure **D**, sultam **21** was produced in 57% (92 mg, 0.28 mmol) as a clear oil. FTIR (neat) 1508, 1334, 1232, 1143, 1116  $\text{cm}^{-1}$ ;  $^1\text{H}$  NMR (500 MHz,  $\text{CDCl}_3$ )  $\delta$  = 6.85 – 6.78 (m, 4H), 5.87 – 5.77 (m, 1H), 5.31 (ddd,  $J$  = 17.1, 1.4, 1.3 Hz, 1H), 5.24 (ddd,  $J$  = 10.1, 1.4, 1.3 Hz, 1H), 4.36 (td,  $J$  = 9.9, 5.1 Hz, 1H), 4.31 – 4.23 (m, 1H), 3.96 – 3.89 (m, 4H), 3.85 (ddd,  $J$  = 2.9, 8.8, 13.7, 1H), 3.74 (s, 3H), 3.47 – 3.36 (m, 2H), 3.36 – 3.27 (m, 2H);  $^{13}\text{C}$  NMR (126 MHz,  $\text{CDCl}_3$ )  $\delta$  = 154.3, 152.5, 132.9, 119.1, 115.6, 114.7, 78.3, 69.4, 63.6, 55.7, 55.3, 51.8, 45.6; HRMS calculated for  $\text{C}_{15}\text{H}_{22}\text{NO}_5\text{S}$  ( $\text{M} + \text{H}^+$ ) 328.1219; found 328.1228 (TOF MS  $\text{ES}^+$ ).

## 2-Cyclopentyl-4-((4-methoxyphenoxy)methyl)-1,4-oxathiazepine-1,1-dioxide (22).

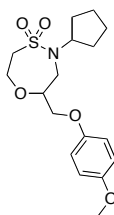

Using general procedure **D**, sultam **22** was produced in 55% (96 mg, 0.27 mmol) as a clear oil. FTIR (neat) 1508, 1336, 1232, 1141  $\text{cm}^{-1}$ ;  $^1\text{H}$  NMR (500 MHz,  $\text{CDCl}_3$ )  $\delta$  = 6.85 – 6.81 (s, 4H), 4.38 – 4.30 (m, 2H), 4.27 (ddd,  $J$  = 13.3, 4.4, 3.0 Hz, 1H), 3.95 (qd,  $J$  = 10.1, 4.5 Hz, 2H), 3.83 (ddd,  $J$  = 13.5, 10.0, 3.8 Hz, 1H), 3.76 (s, 3H), 3.34 – 3.26 (m, 3H), 3.17 (dd,  $J$  = 14.2, 10.5 Hz, 1H), 2.02 – 1.92 (m, 1H), 1.91 – 1.82 (m, 1H), 1.74 – 1.62 (m, 3H), 1.62 – 1.47 (m, 3H);  $^{13}\text{C}$  NMR (126 MHz,  $\text{CDCl}_3$ )  $\delta$  = 154.2, 152.6, 115.5, 114.7, 80.1, 69.5, 66.3, 59.5, 55.9, 55.7, 42.8, 30.7, 28.7, 24.1, 23.5; HRMS calculated for  $\text{C}_{17}\text{H}_{26}\text{NO}_5\text{S}$  ( $\text{M} + \text{H}^+$ ) 356.1532; found 356.1539 (TOF MS  $\text{ES}^+$ ).

## 4-(Phenoxymethyl)-2-(prop-2-ynyl)-1,4-oxathiazepine-1,1-dioxide (23).

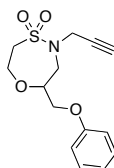

Using general procedure **D**, sultam **23** was produced in 53% (77 mg, 0.26 mmol) as a clear oil. FTIR (neat) 2358, 1598, 1494, 1336, 1244, 1147  $\text{cm}^{-1}$ ;  $^1\text{H}$  NMR (500 MHz,  $\text{CDCl}_3$ )  $\delta$  = 7.32 – 7.27 (m, 2H), 7.00 – 6.96 (m, 1H), 6.93 – 6.90 (m, 2H), 4.50 (m, 1H), 4.31 (ddd,  $J$  = 13.7, 5.0, 3.7 Hz, 1H), 4.24 (dd,  $J$  = 17.6, 2.5 Hz, 1H), 4.19 (dd, 17.6, 2.5 Hz, 1H), 4.06 – 4.00 (m, 2H), 3.92 (ddd,  $J$  = 13.7, 9.1, 2.7 Hz, 1H), 3.67 – 3.57 (m, 2H), 3.44 (ddd,  $J$  = 14.3, 9.1, 3.7 Hz, 1H), 3.36 (ddd,  $J$  = 14.4, 5.1, 2.7 Hz, 1H), 2.38 (t,  $J$  = 2.5 Hz, 1H);  $^{13}\text{C}$  NMR (126 MHz,  $\text{CDCl}_3$ )  $\delta$  = 158.3, 129.6, 121.4, 114.5, 77.9, 77.5, 74.2, 68.7, 63.6, 55.9, 46.9, 39.2; HRMS calculated for  $\text{C}_{14}\text{H}_{17}\text{NO}_4\text{SNa}$  ( $\text{M} + \text{Na}^+$ ) 318.0776; found 318.0778 (TOF MS  $\text{ES}^+$ ).

## ((S)-5-Oxo-2-((R)-1-phenylethyl)-1,4-oxathiazepine-4-yl)methyl butyrate-1,1-dioxide (24).

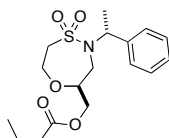

Using general procedure **D**, sultam **24** was produced in 60% (106 mg, 0.3 mmol) as a clear oil. FTIR (neat) 1735, 1334, 1170, 1116  $\text{cm}^{-1}$ ;  $^1\text{H}$  NMR (500 MHz,  $\text{CDCl}_3$ )  $\delta$  = 7.42 – 7.38 (m, 2H), 7.38 – 7.33 (m, 2H), 7.31 – 7.27 (m, 1H), 5.36 (q,  $J$  = 7.0 Hz, 1H), 4.27 (dt,  $J$  = 13.4, 3.8 Hz, 1H), 4.01 – 3.91 (m, 3H), 3.82 – 3.75 (m, 1H), 3.39 – 3.35 (m, 2H), 2.97 – 2.91 (m, 1H), 2.75 (ddd,  $J$  = 9.2, 6.4, 5.8 Hz, 1H), 2.28 (t,  $J$  = 7.4 Hz, 2H), 1.62 (q,  $J$  = 7.2 Hz, 2H), 1.58 (d,  $J$  = 6.7 Hz, 3H), 0.93 (t,  $J$  = 7.2 Hz, 3H);  $^{13}\text{C}$  NMR (126 MHz,  $\text{CDCl}_3$ )  $\delta$  = 173.2, 139.9, 128.6, 127.8, 127.4, 79.3, 66.3, 64.4, 56.9, 55.8, 42.8, 35.9, 18.3, 16.6, 13.6; HRMS calculated for  $\text{C}_{17}\text{H}_{25}\text{NO}_5\text{SNa}$  ( $\text{M} + \text{Na}^+$ ) 378.1351; found 378.1342 (TOF MS  $\text{ES}^+$ );  $[\alpha]_{\text{D}}^{25}$  = +12.9 ( $c$  = 2.2,  $\text{CHCl}_3$ ).

4-(Benzyloxymethyl)-2-butyl-9-fluoro-1,2-benzoxathiazepine-1,1-dioxide **1**

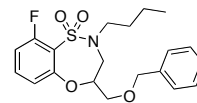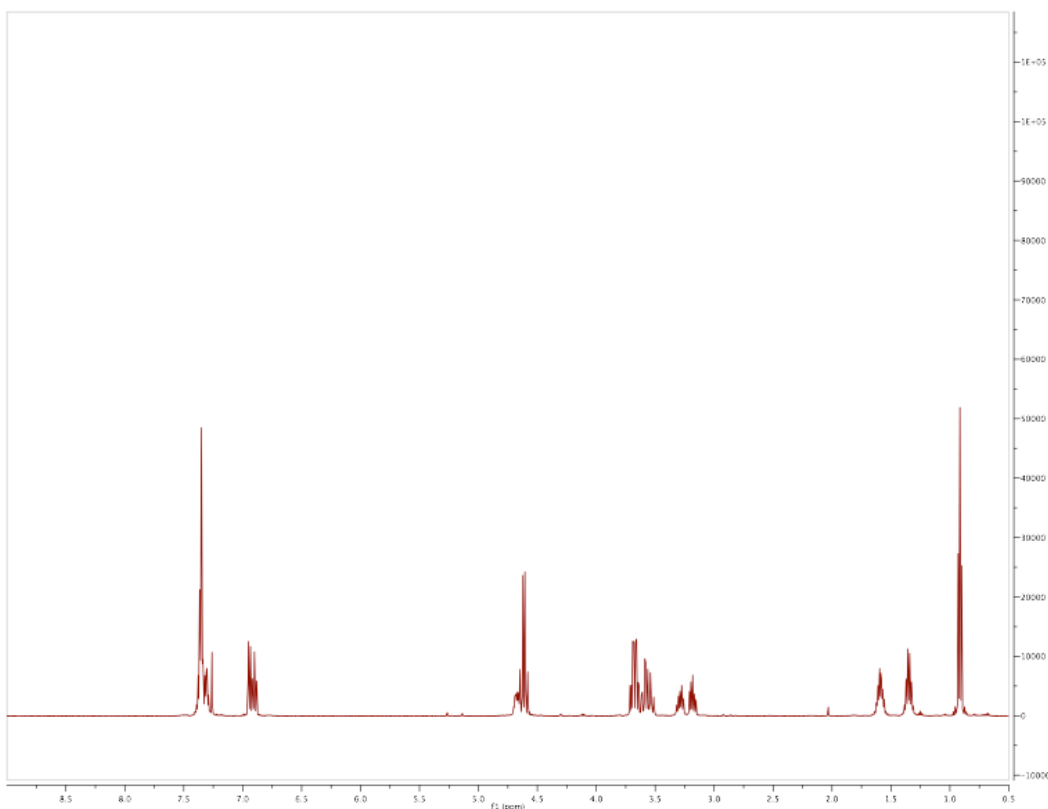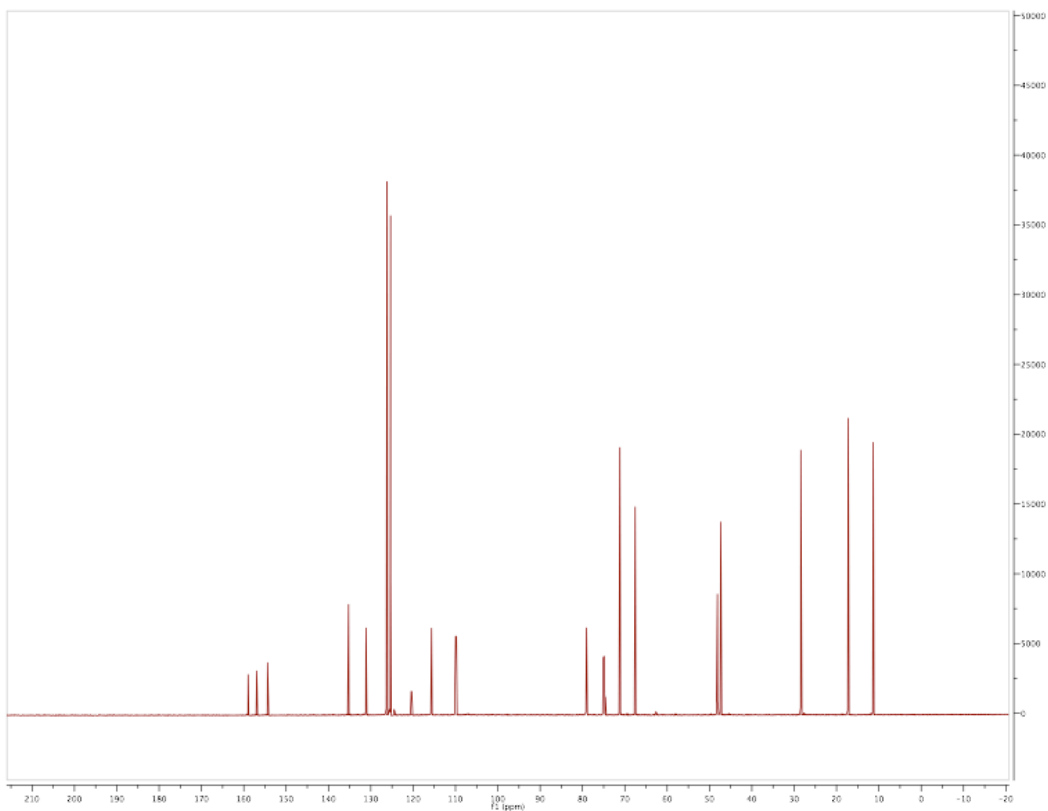

4-(But-3-enyl)-2-butyl-9-fluoro-1,2-benzoxathiazepine-1,1-dioxide **2**

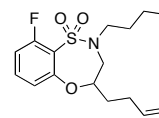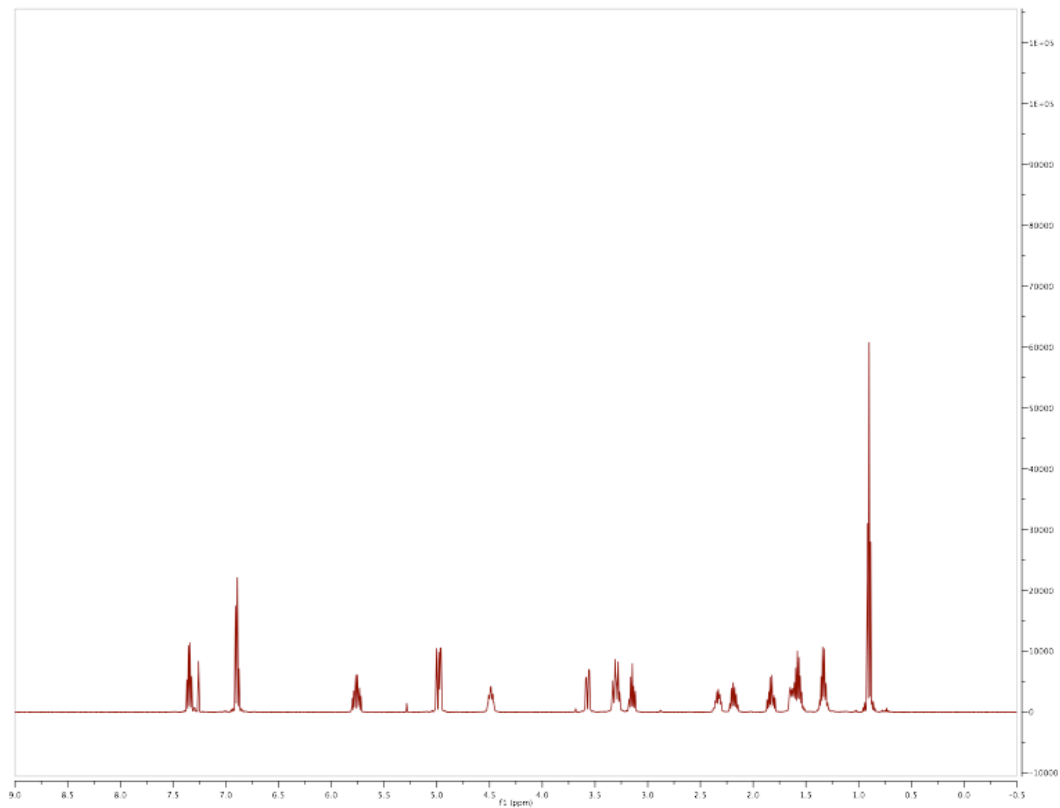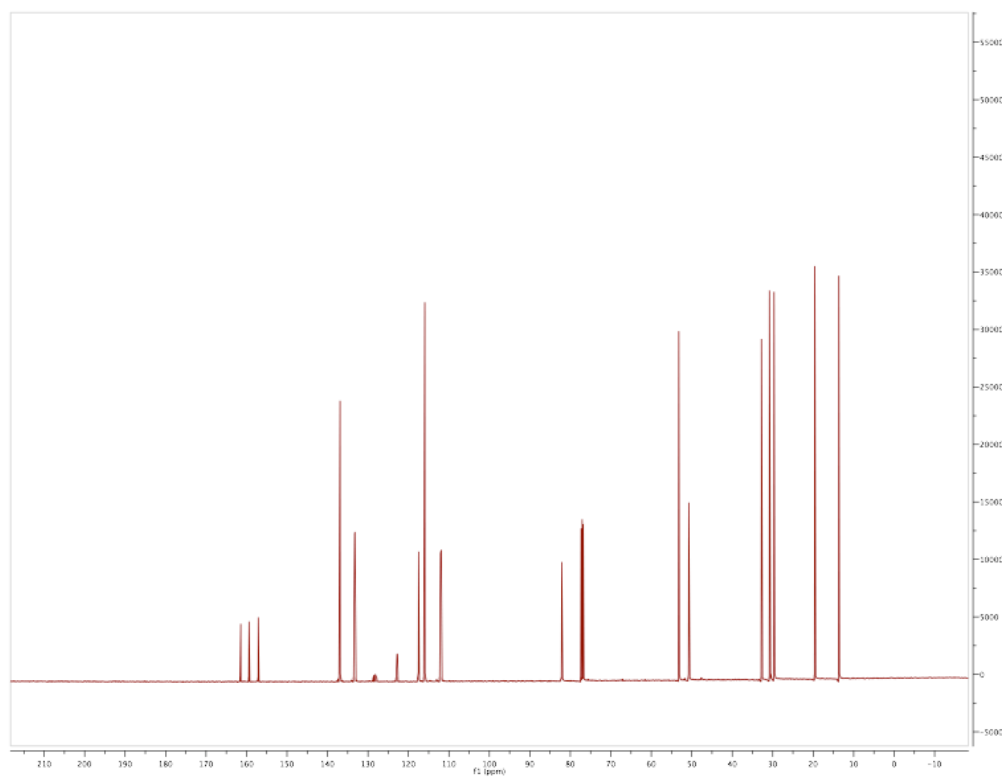

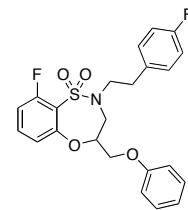

9-Fluoro-2-(4-fluorophenethyl)-4-(phenoxyethyl)-1,2-benzoxathiazepine-1,1-dioxide **3**

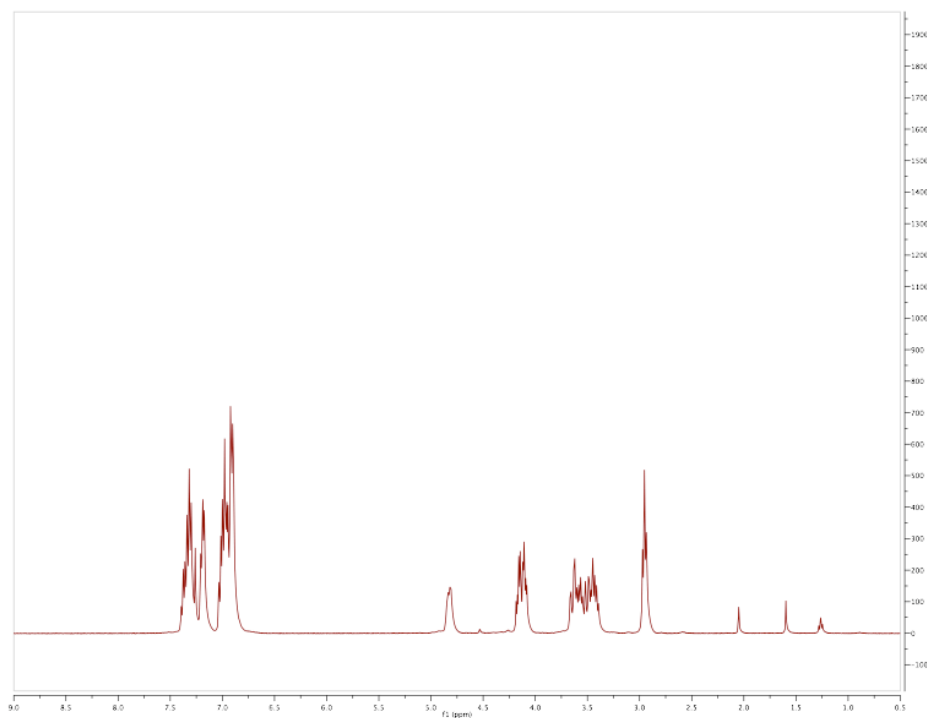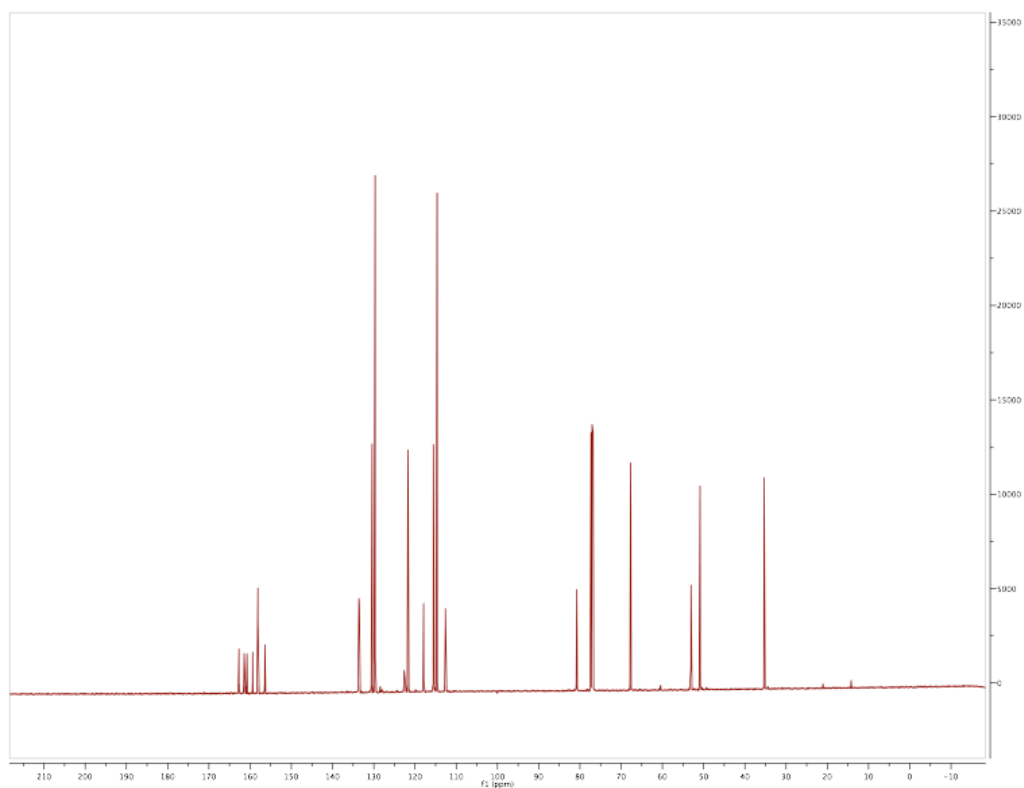

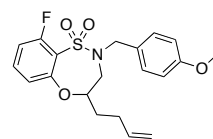

4-(But-3-enyl)-9-fluoro-2-(4-methoxybenzyl)-1,2-benzoxathiazepine-1,1-dioxide **4**

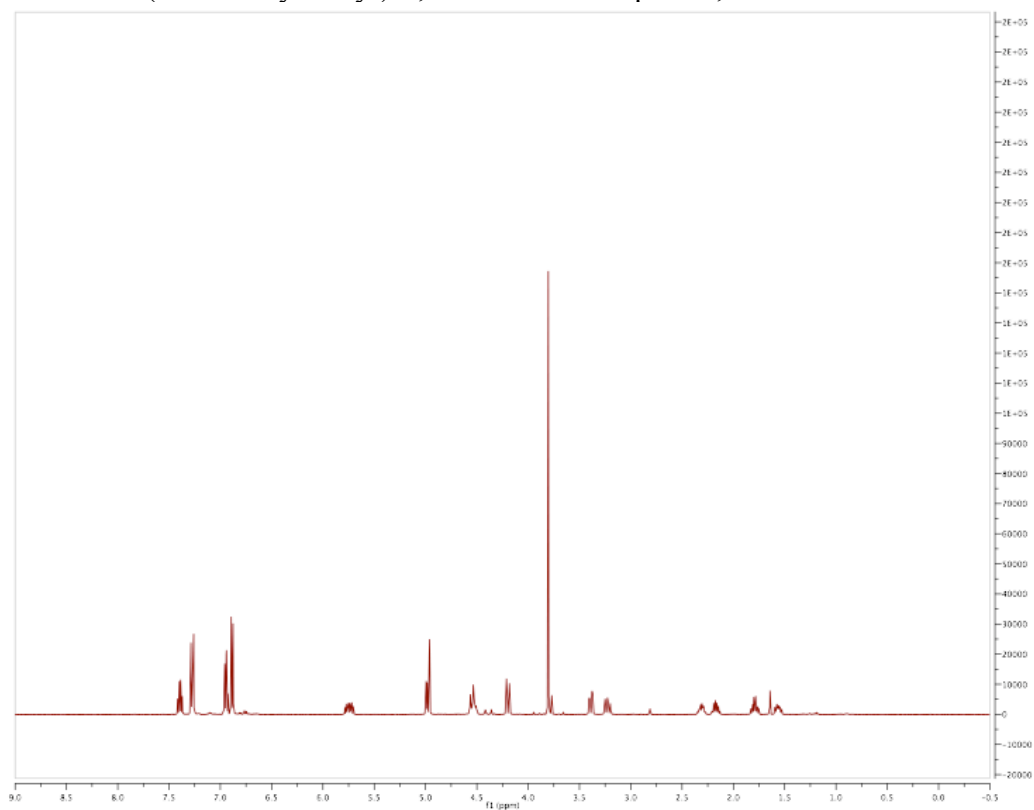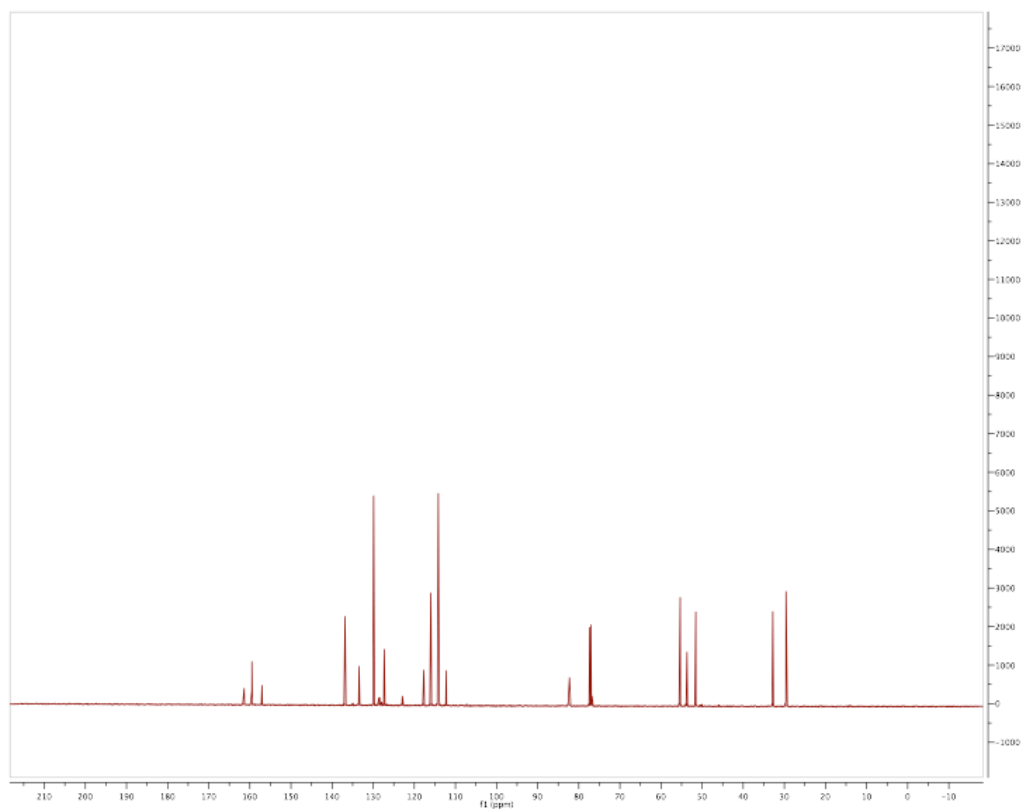

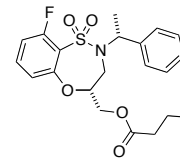

**((R)-9-Fluoro-2-((R)-1-phenylethyl)-1,2-benzoxathiazepine-1,1-dioxide)methyl butyrate 5**

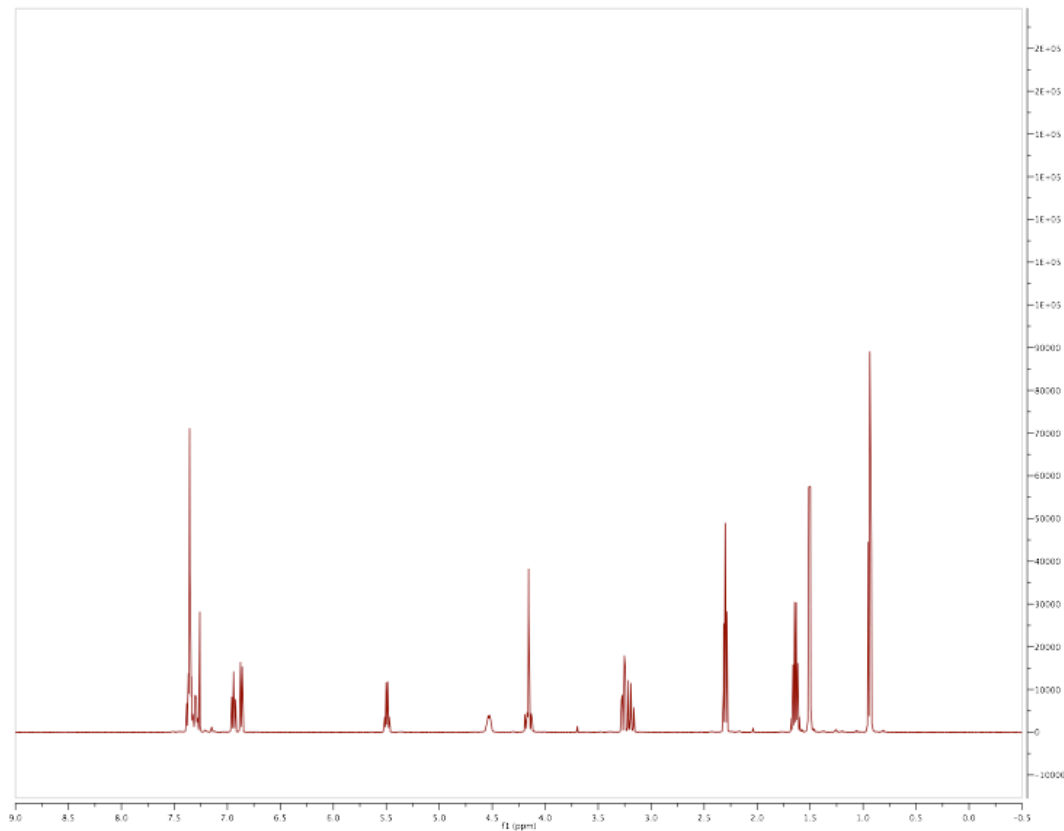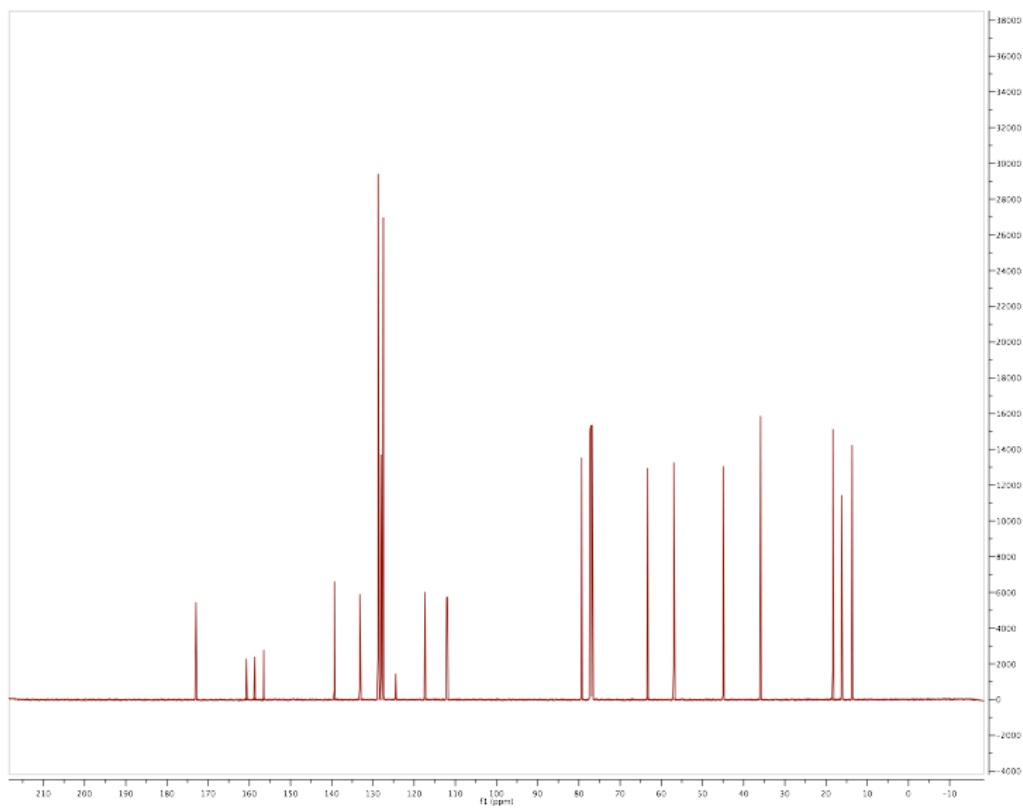



4-(Benzyloxymethyl)-7-bromo-2-butyl-1,2-benzoxathiazepine-1,1-dioxide **6**

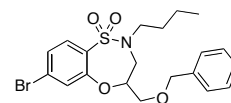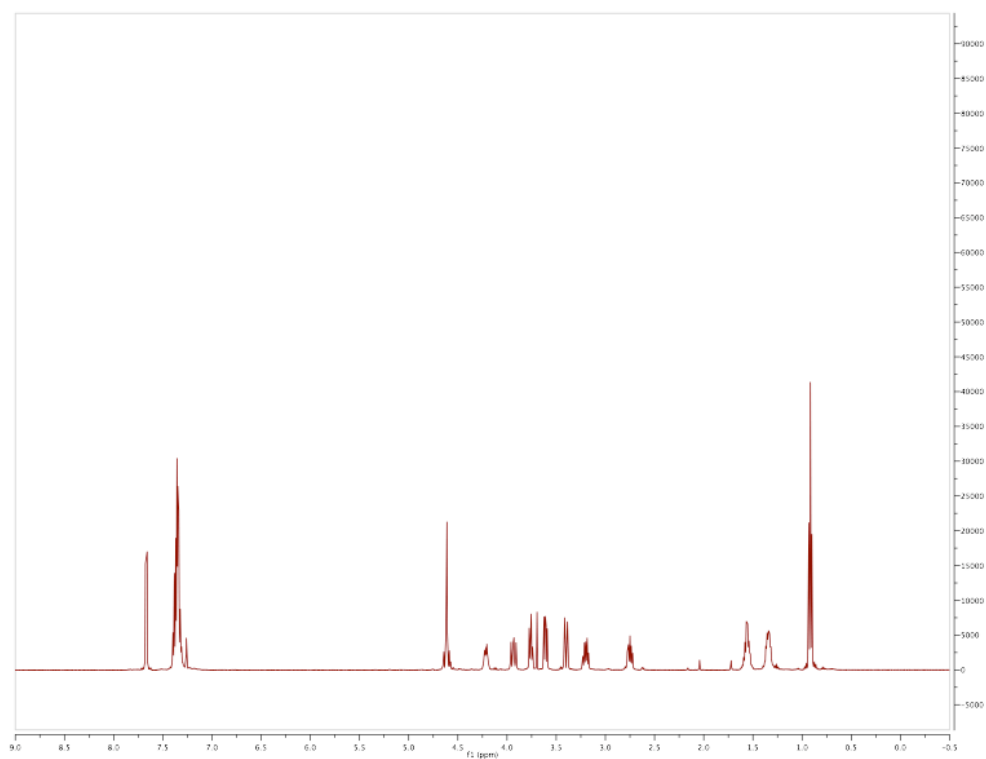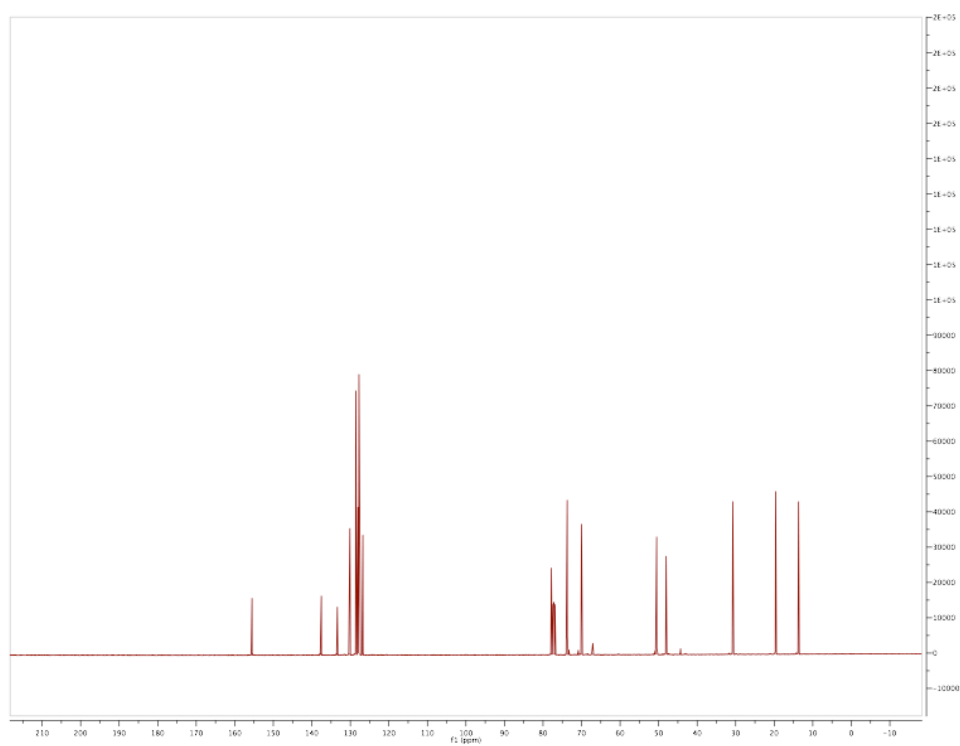

2-Allyl-4-(butoxymethyl)-8-chloro-1,2-benzoxathiazepine-1,1-dioxide **7**

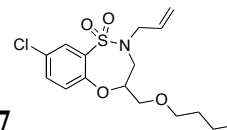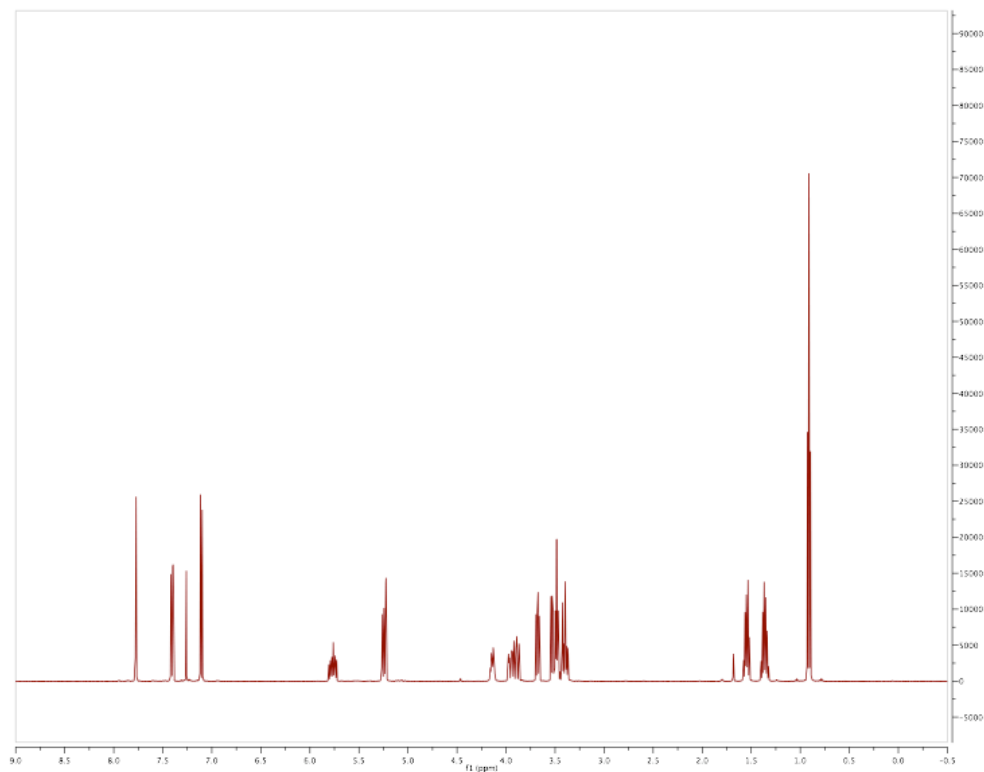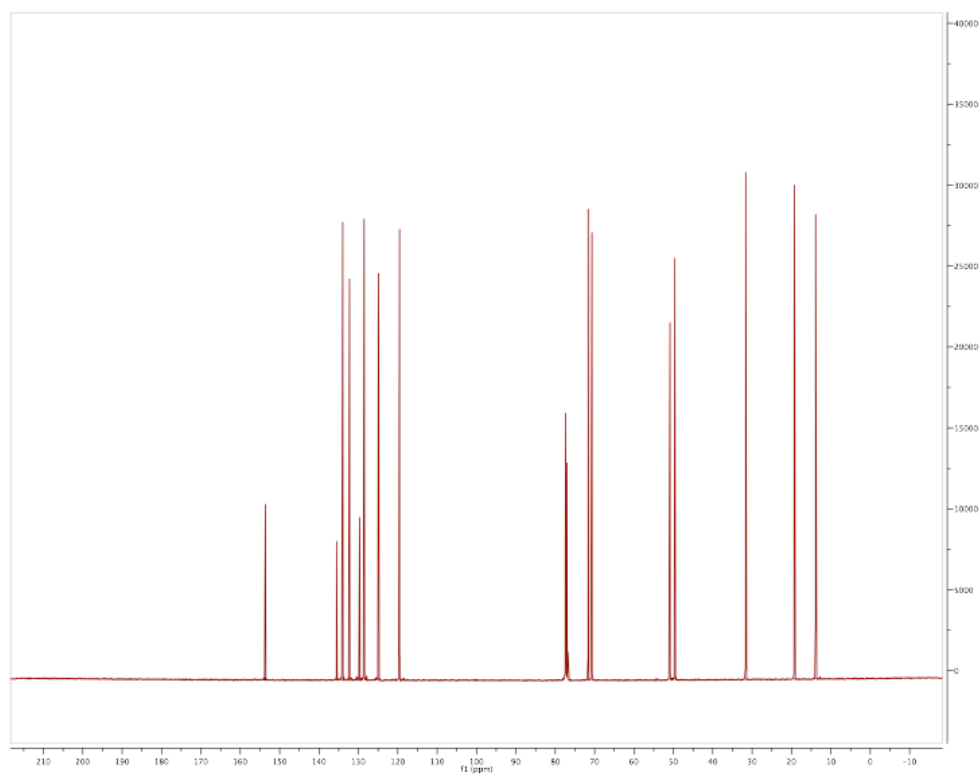

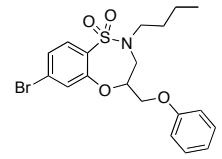

7-Bromo-2-butyl-4-(phenoxymethyl)-1,2-benzoxathiazepine-1,1-dioxide **8**

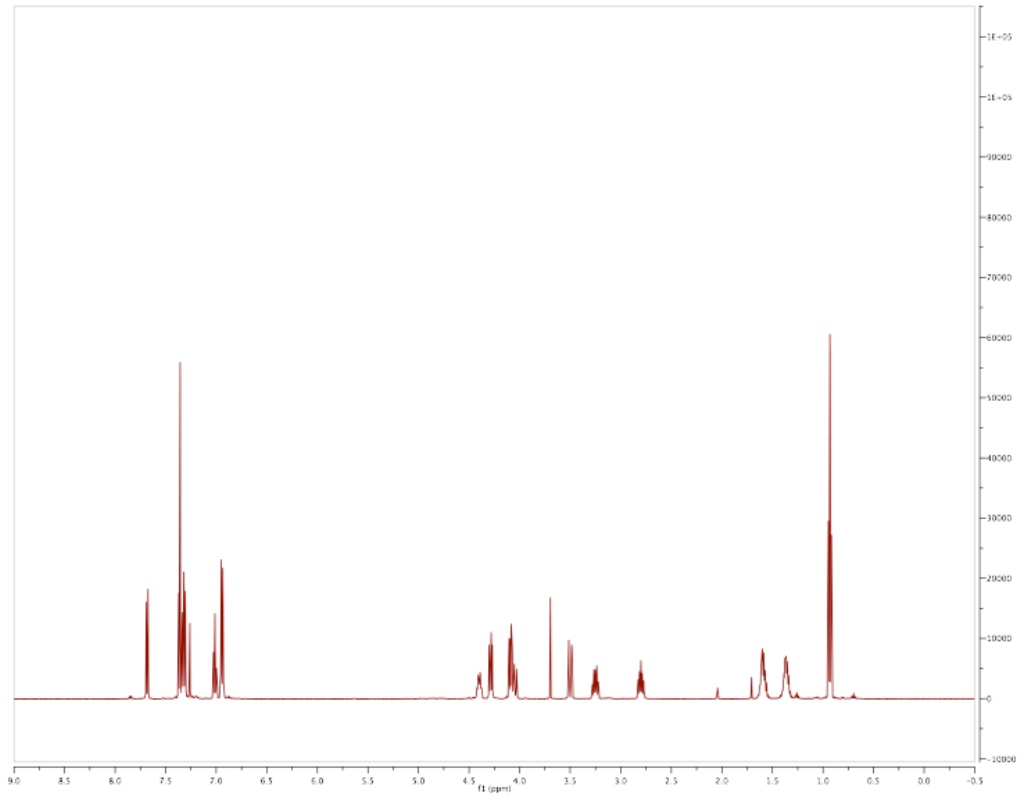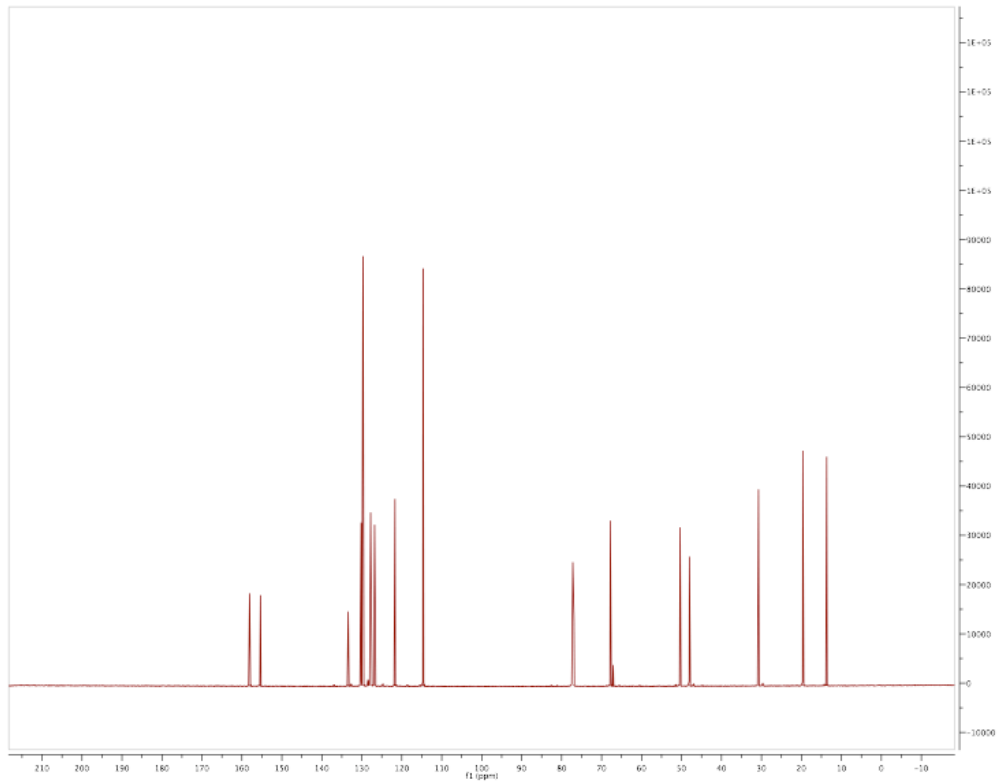

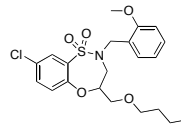

4-(Butoxymethyl)-8-chloro-2-(2-methoxybenzyl)-1,2-benzoxathiazepine-1,1-dioxide **9**

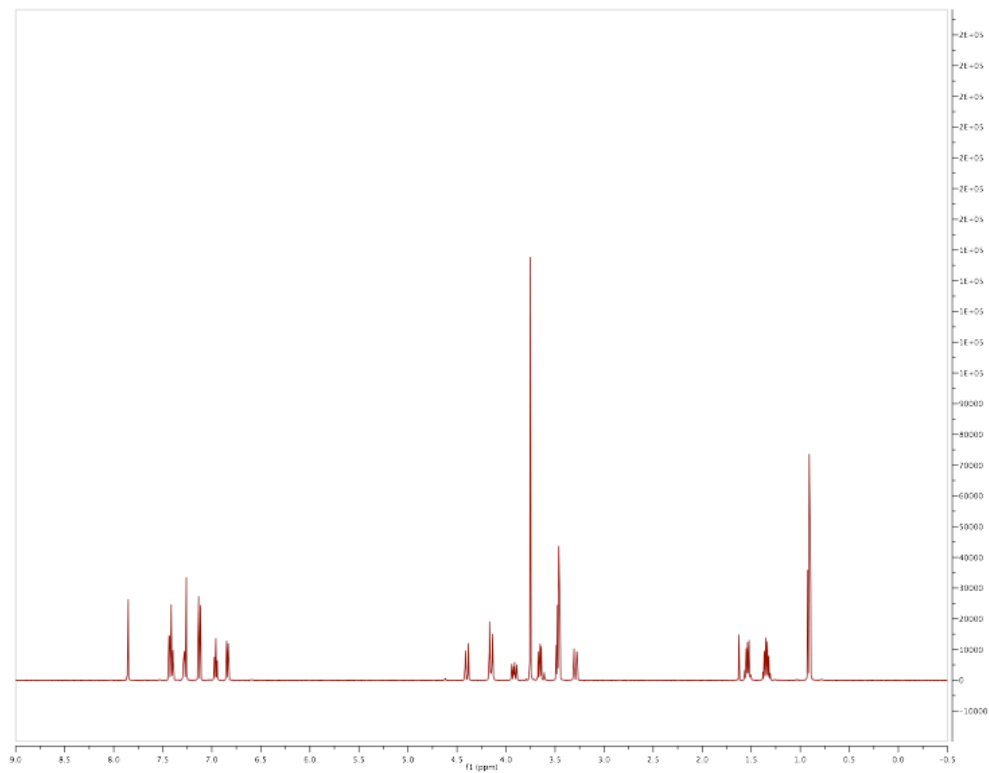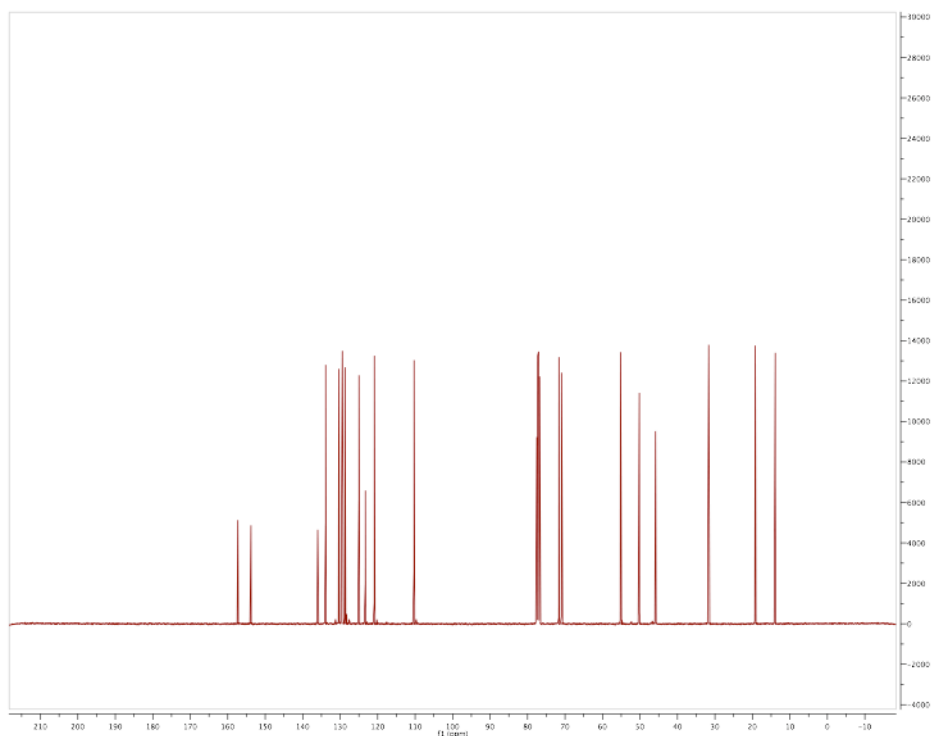

(R)-(2-Allyl-9-fluoro-1,2-benzoxathiazepine-1,1-dioxide)methanol **11**

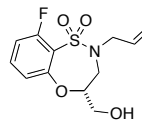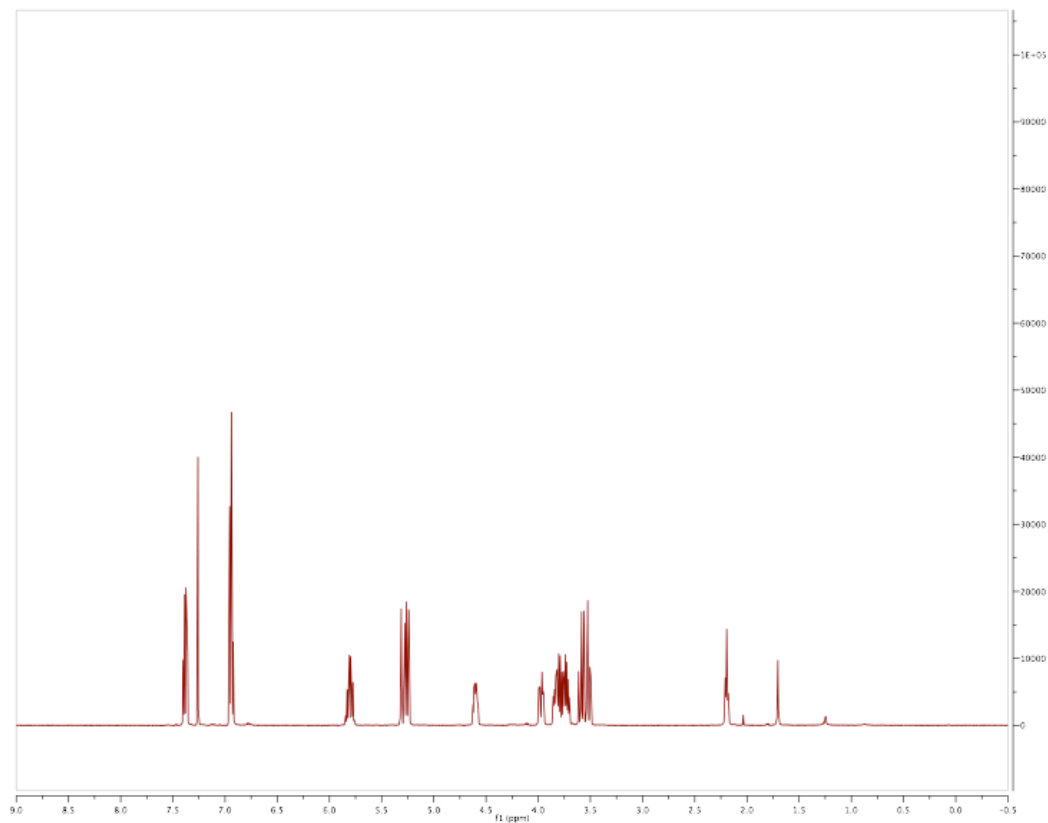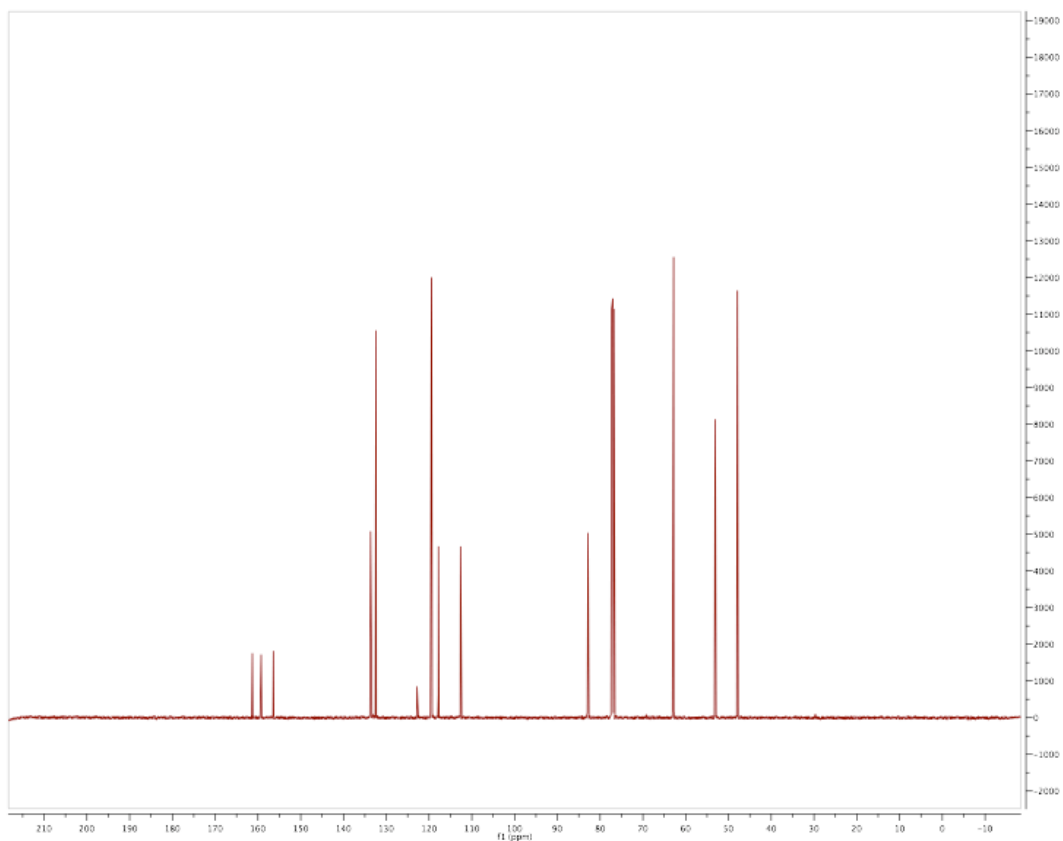

(*R*)-(2-Allyl-9-fluoro-1,2-benzoxathiazepine-1,1-dioxide)methyl 3-methylbenzoate **12**

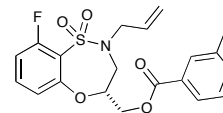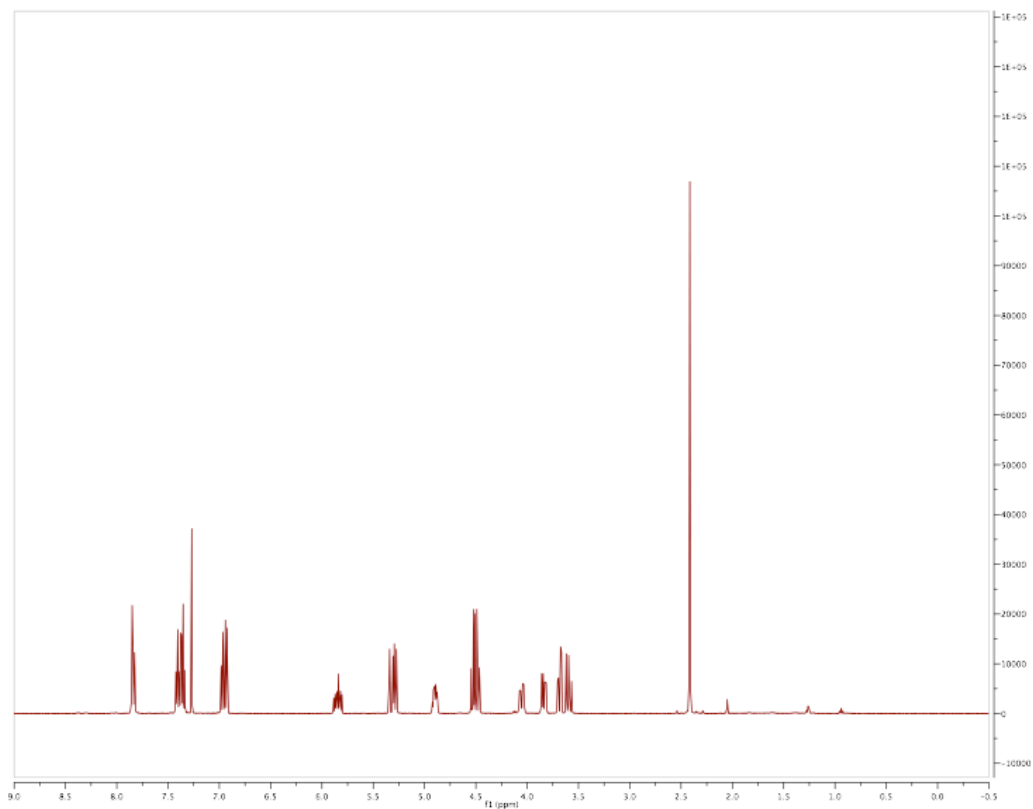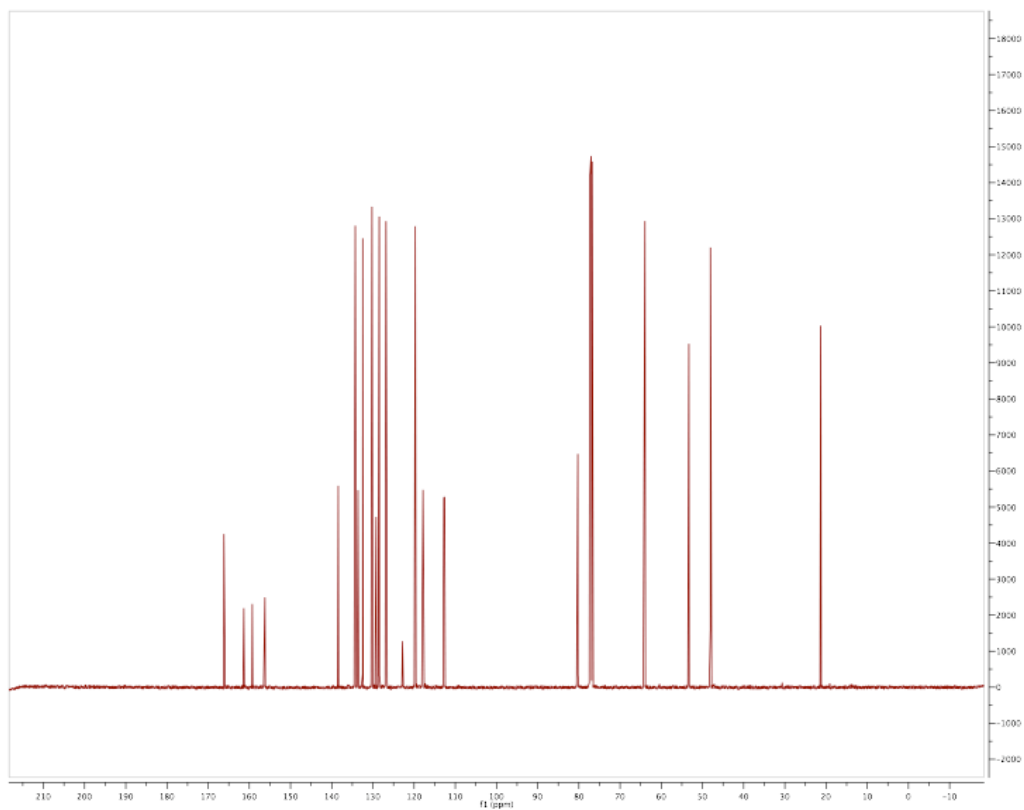

(*R*)-(2-Allyl-9-fluoro-1,2-benzoxathiazepine-1,1-dioxide)methyl 3-methoxybenzoate **13**

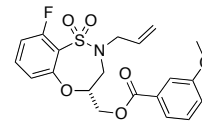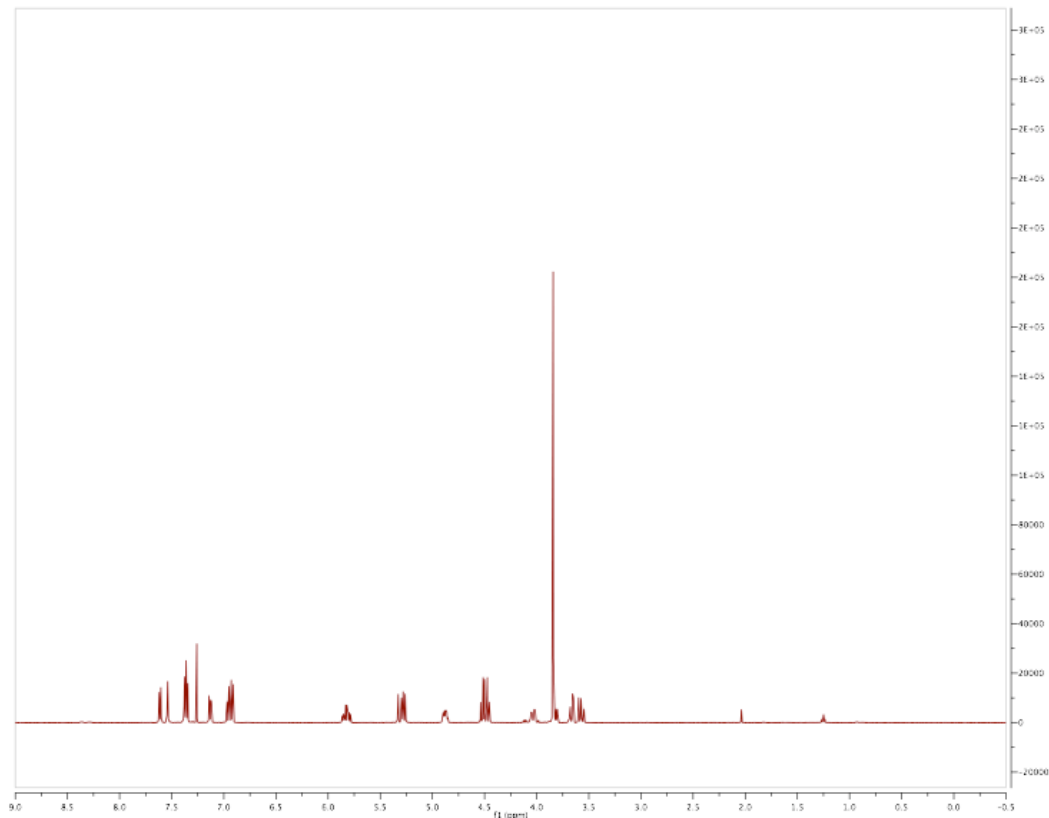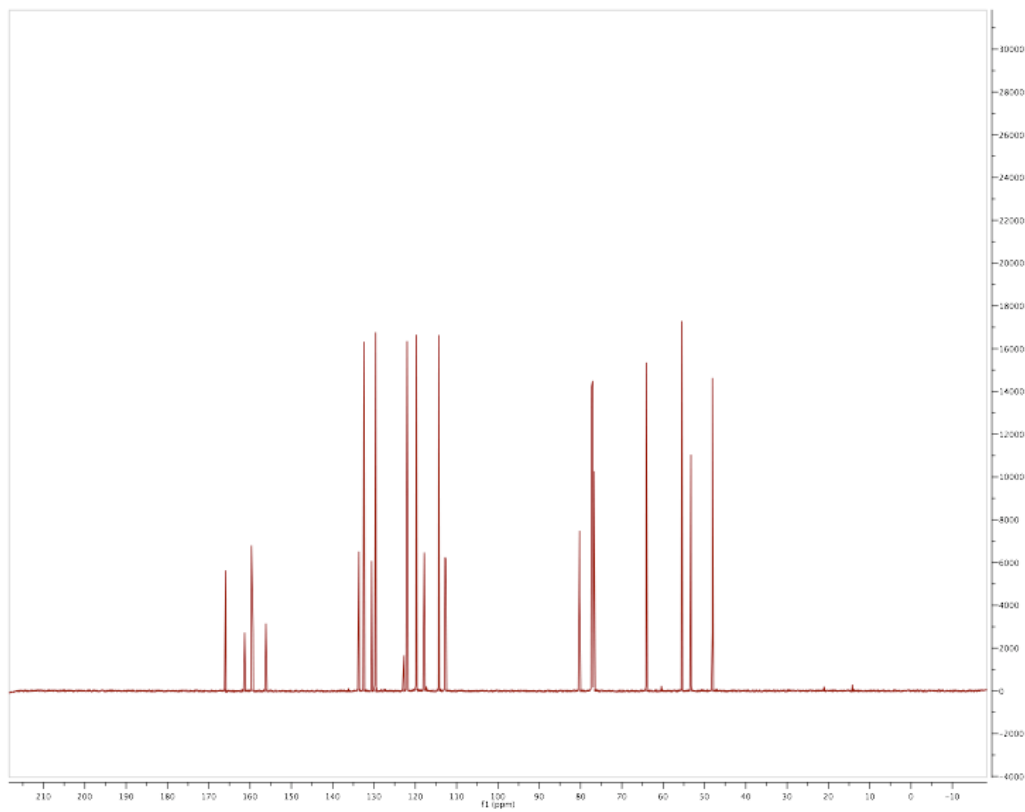

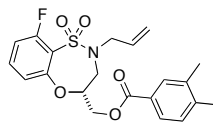

(*R*)-(2-Allyl-9-fluoro-1,2-benzoxathiazepine-1,1-dioxide)methyl 3,4-dimethylbenzoate **14**

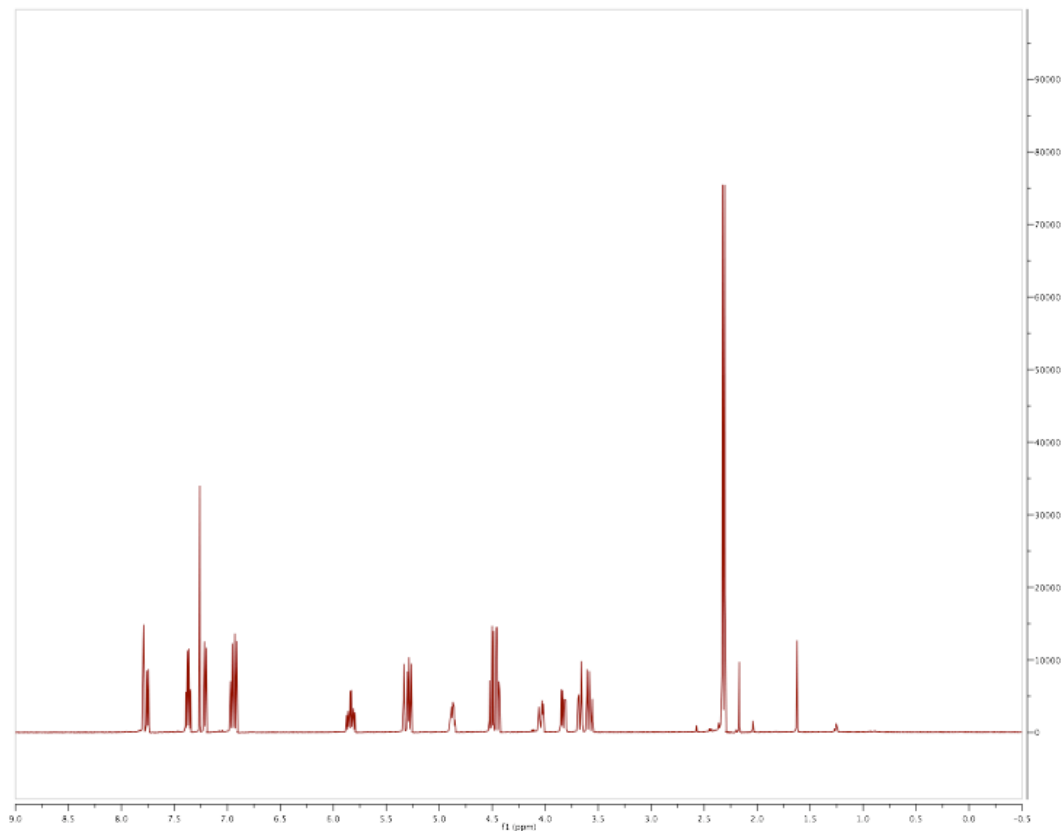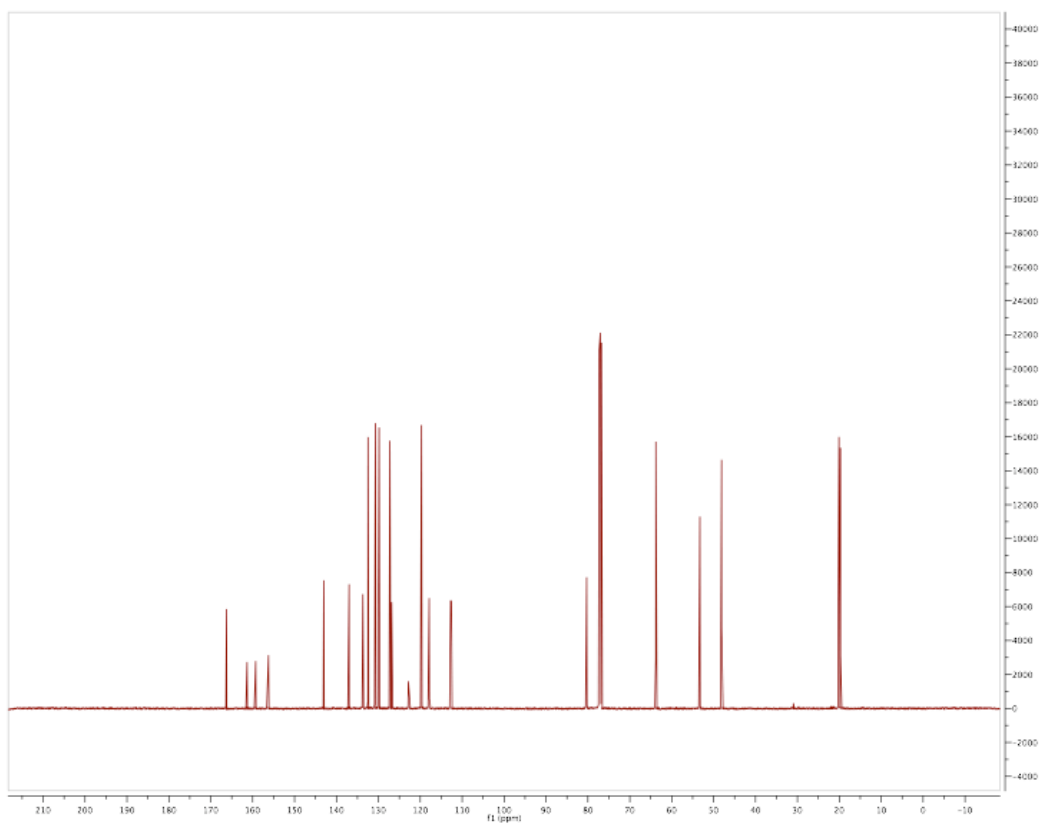



(*R*)-(2-Allyl-9-fluoro-1,2-benzoxathiazepine-1,1-dioxide)methyl 2-cyanoacetate **15**

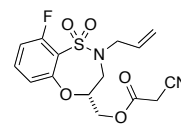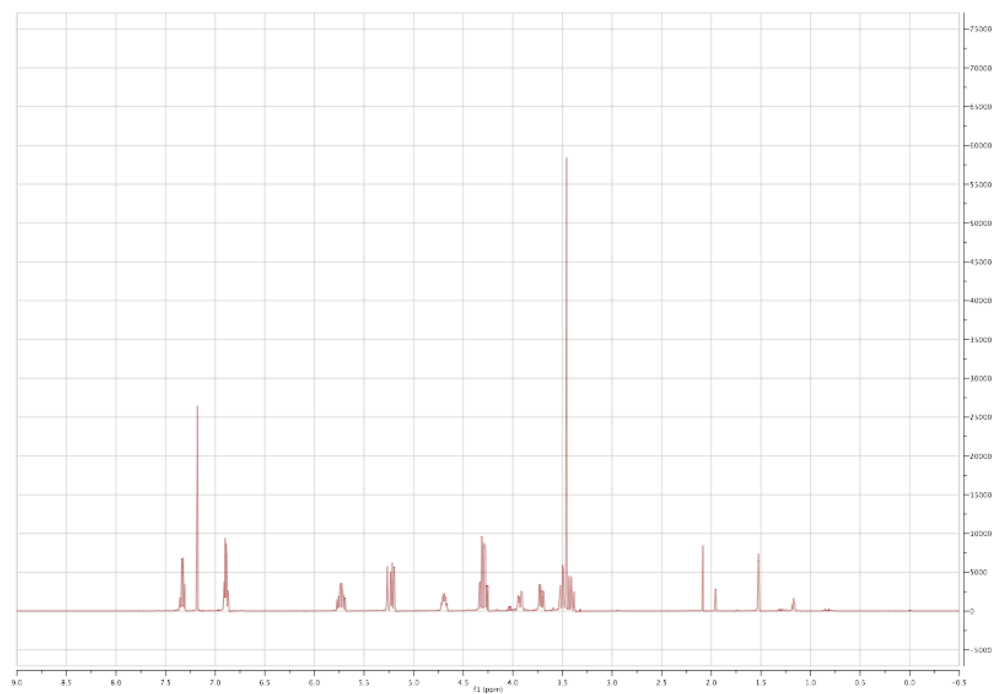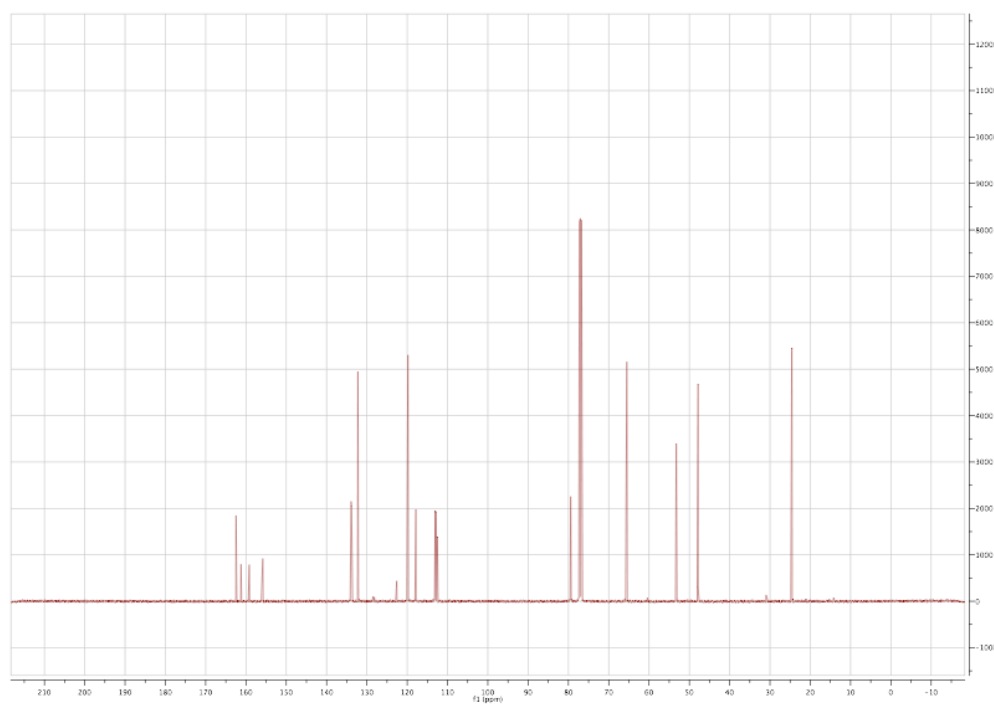

**(R)-(2-Allyl-9-fluoro-1,2-benzoxathiazepine-1,1-dioxide)methyl-2-(phenylthio)acetate **16****

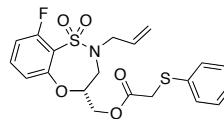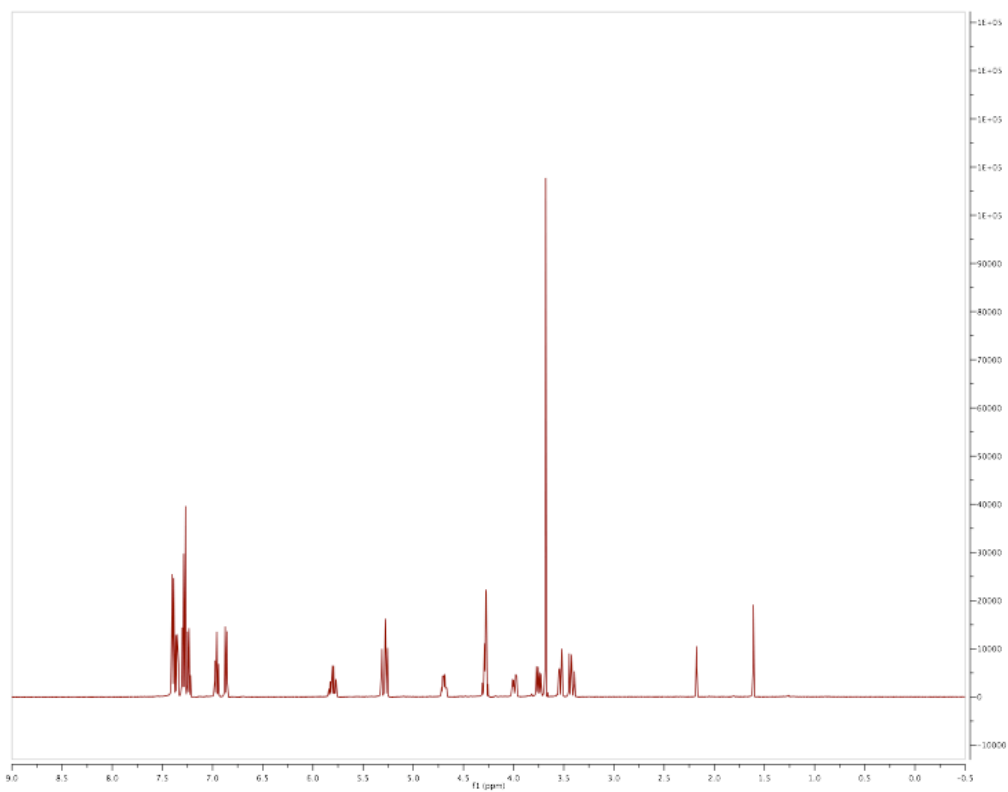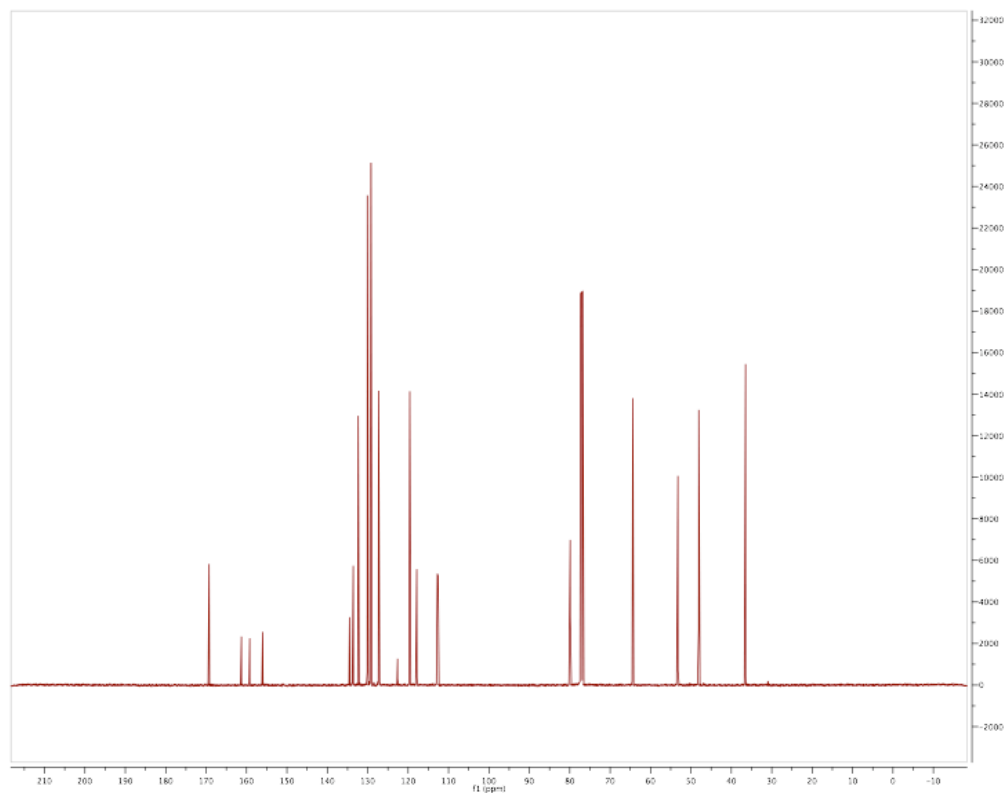

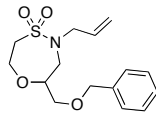

2-Allyl-4-(benzyloxymethyl)-1,4-oxathiazepine-1,1-dioxide **17**

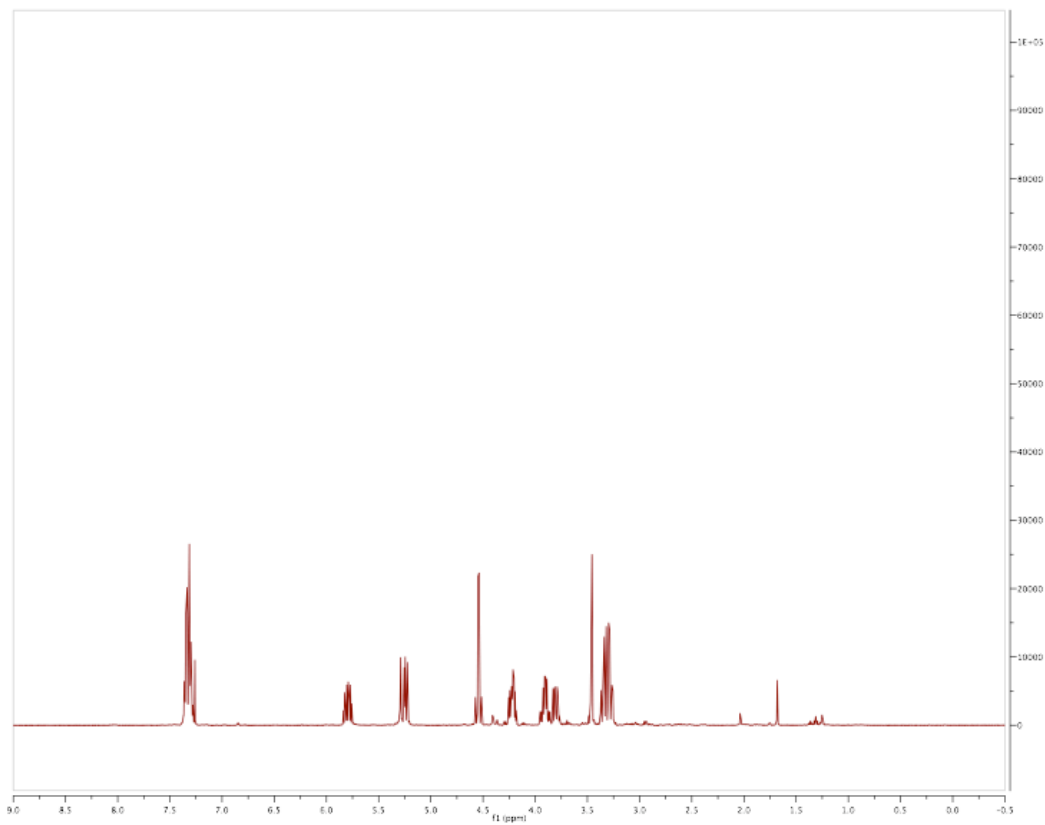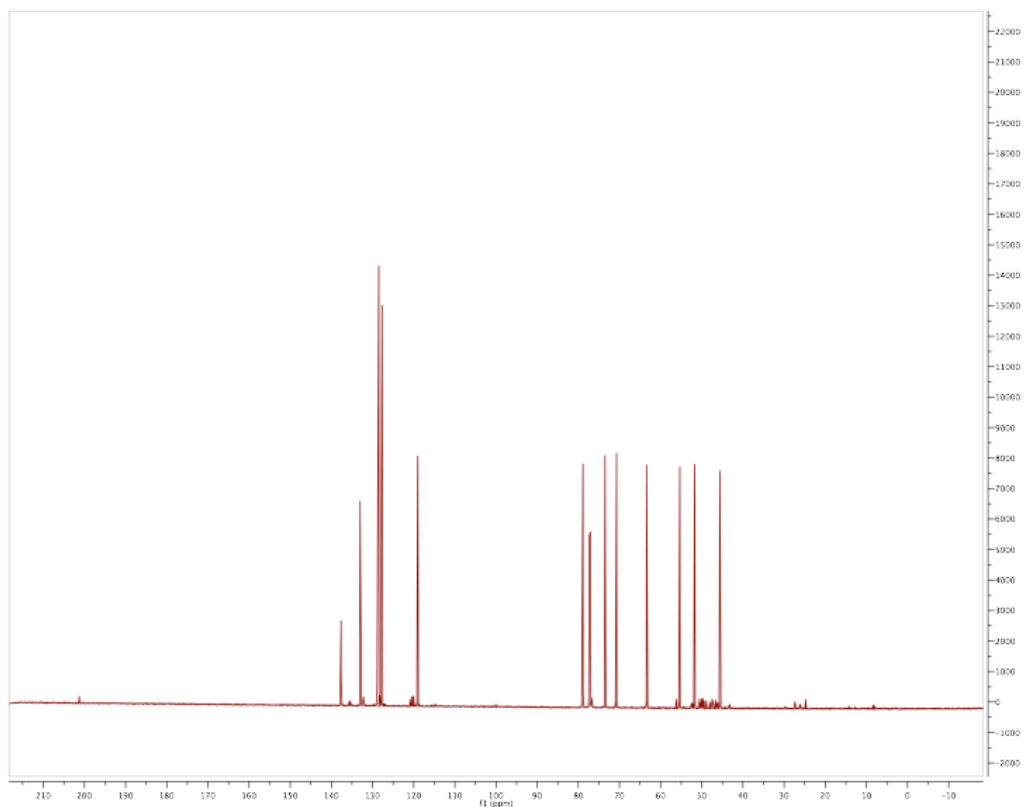

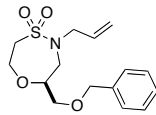

(*S*)-2-Allyl-4-(benzyloxymethyl)-1,4-oxathiazepine-1,1-dioxide **18**

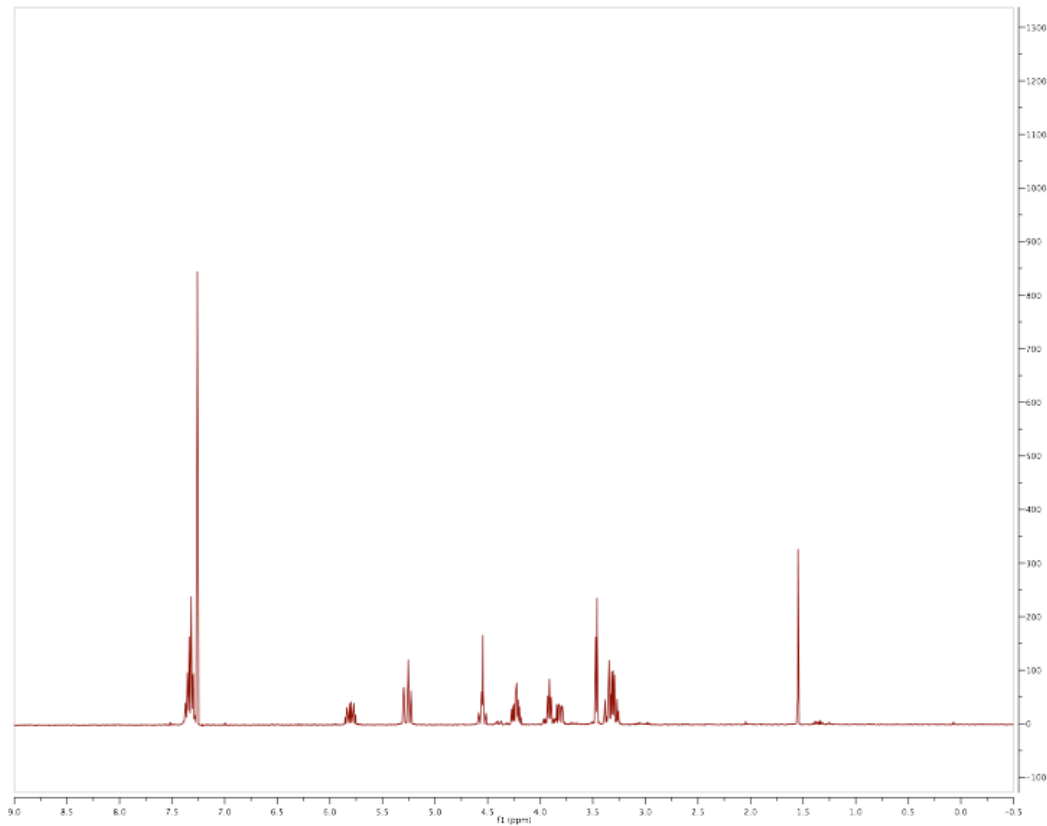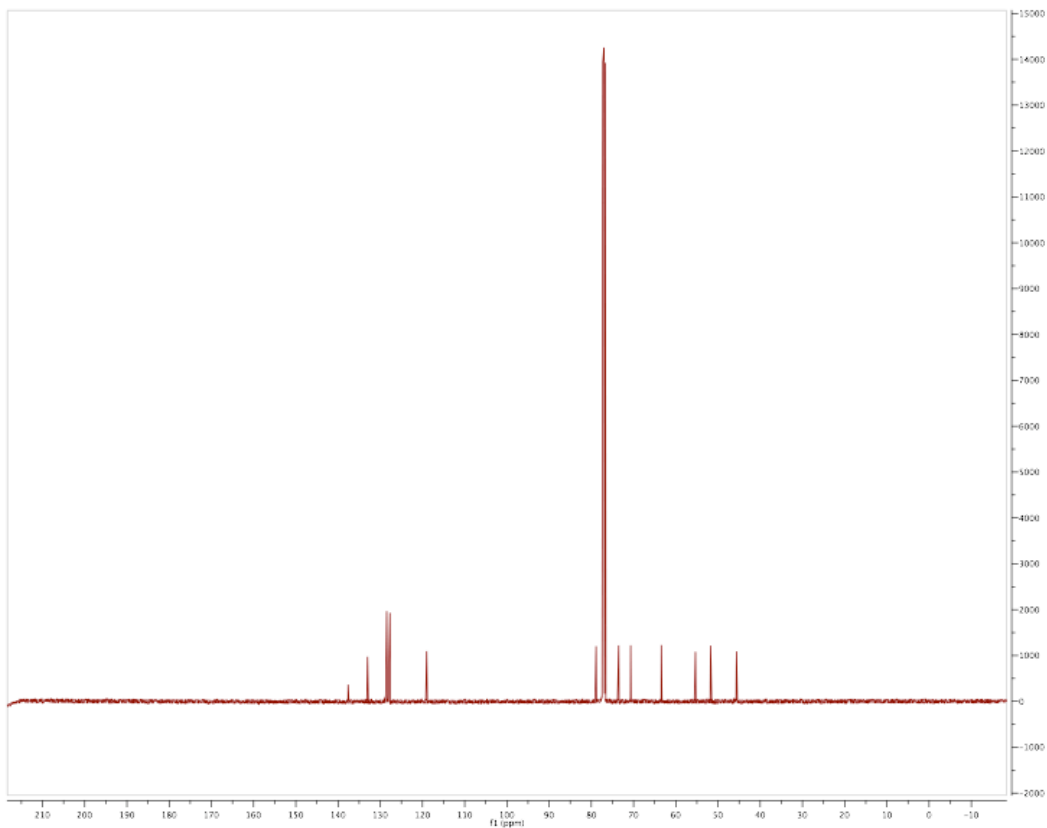

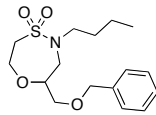

2-Butyl-4-(benzyloxymethyl)-1,4-oxathiazepine-1,1-dioxide **19**

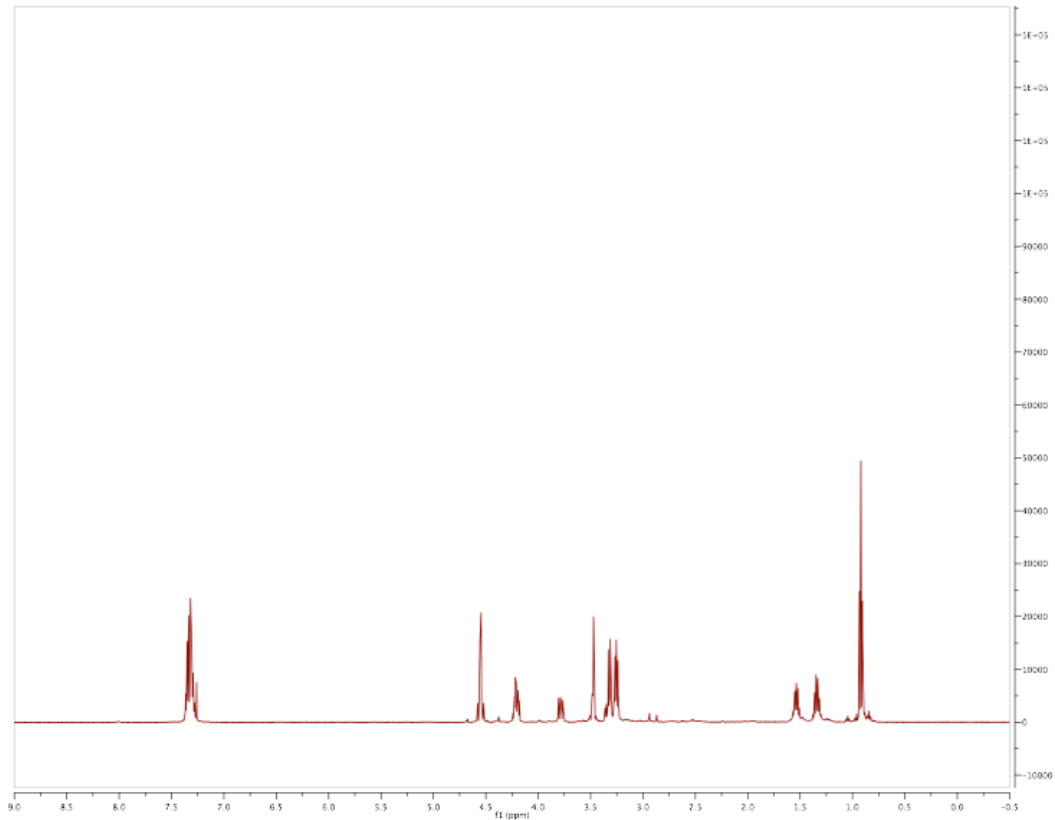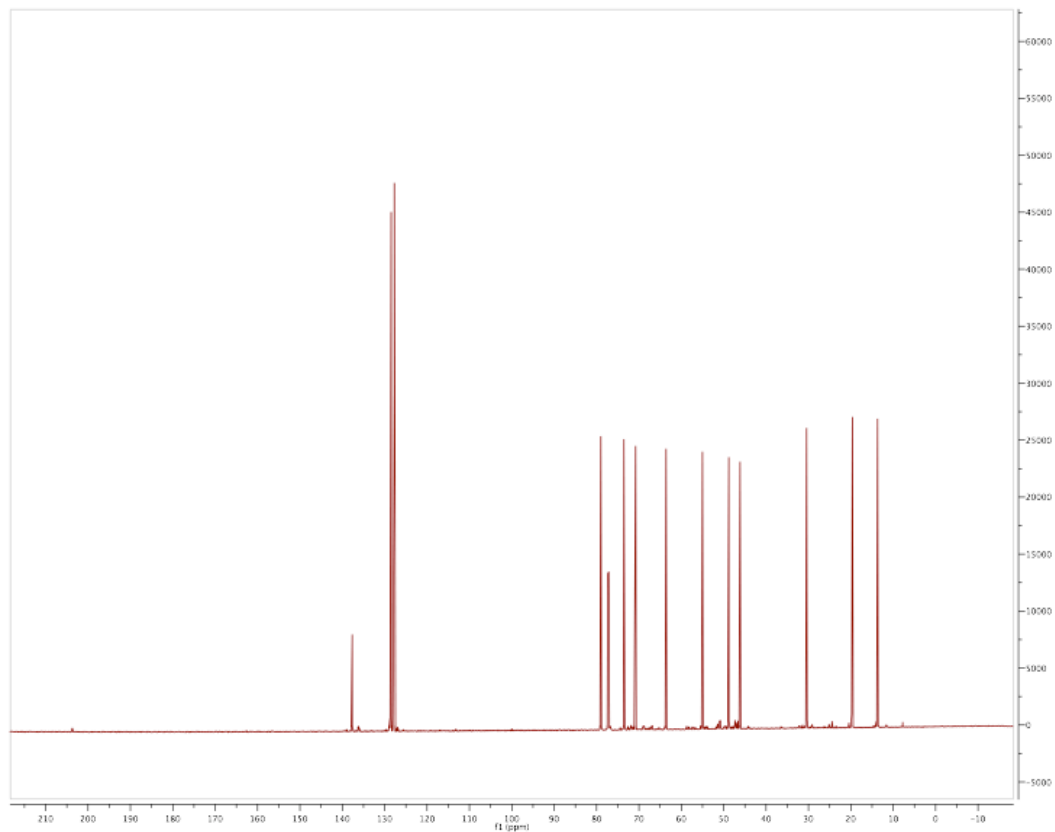

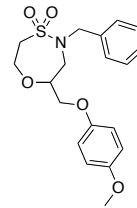

2-Benzyl-4-((4-methoxyphenoxy)methyl)-1,4-oxathiazepine-1,1-dioxide **20**

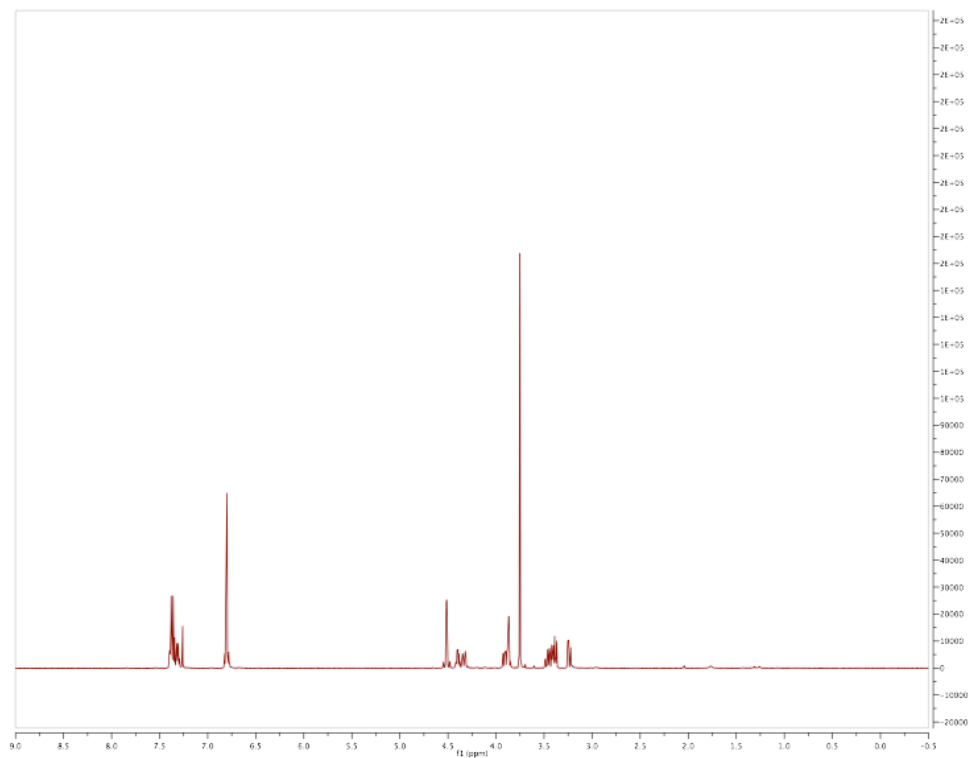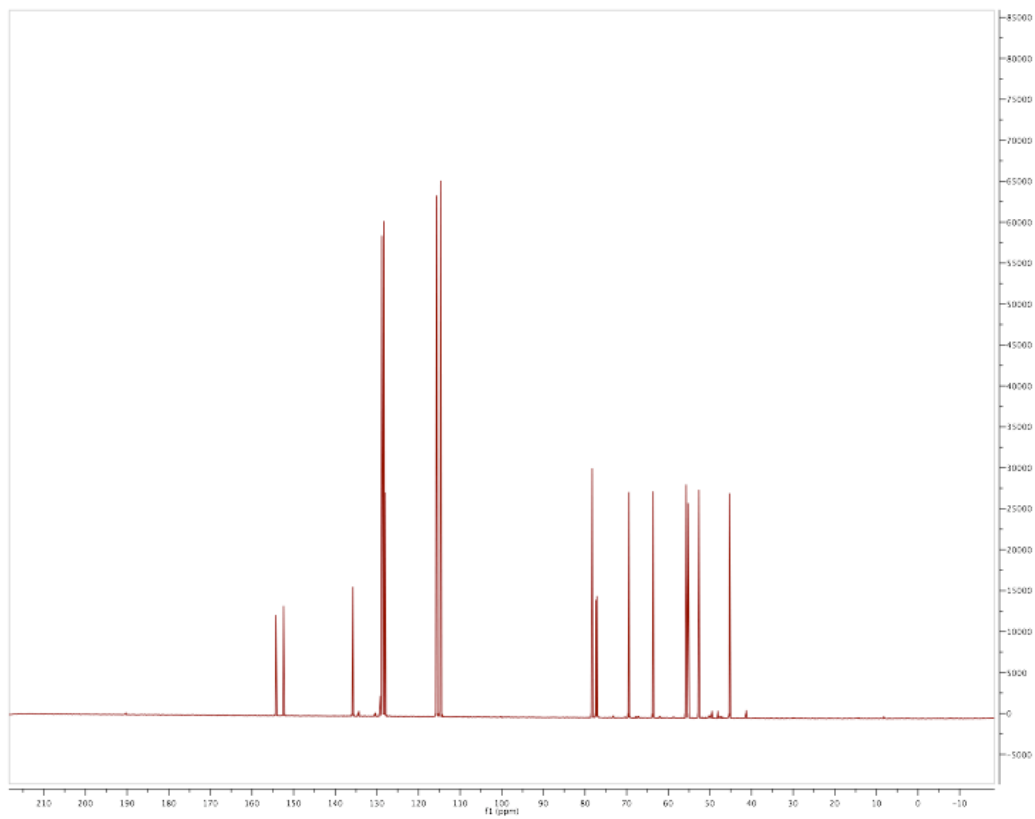

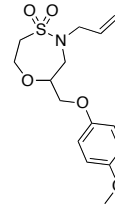

2-Allyl-4-((4-methoxyphenoxy)methyl)-1,4-oxathiazepine-1,1-dioxide **21**

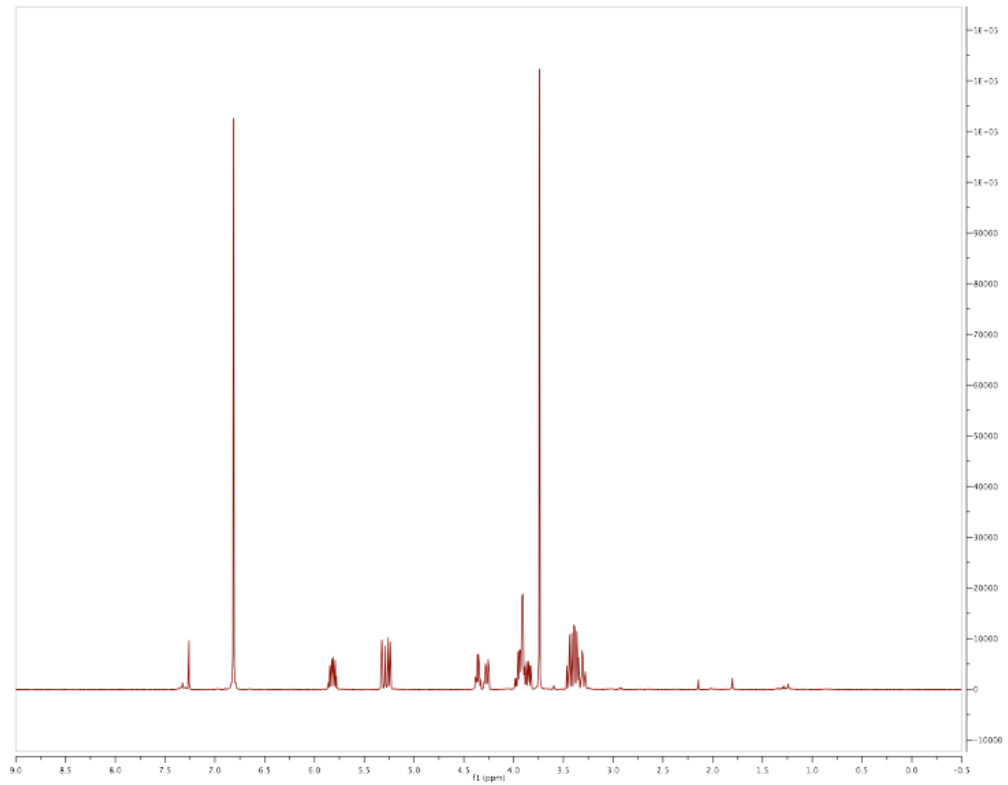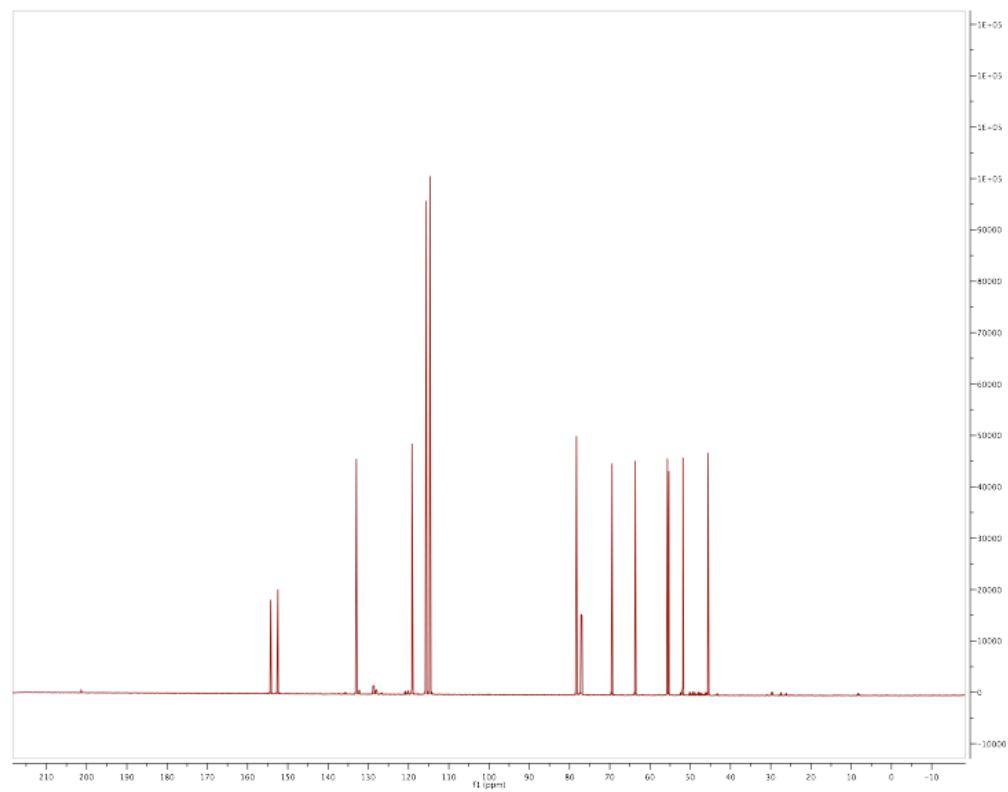

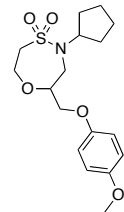

2-Cyclopentyl-4-((4-methoxyphenoxy)methyl)-1,4-oxathiazepine-1,1-dioxide **22**

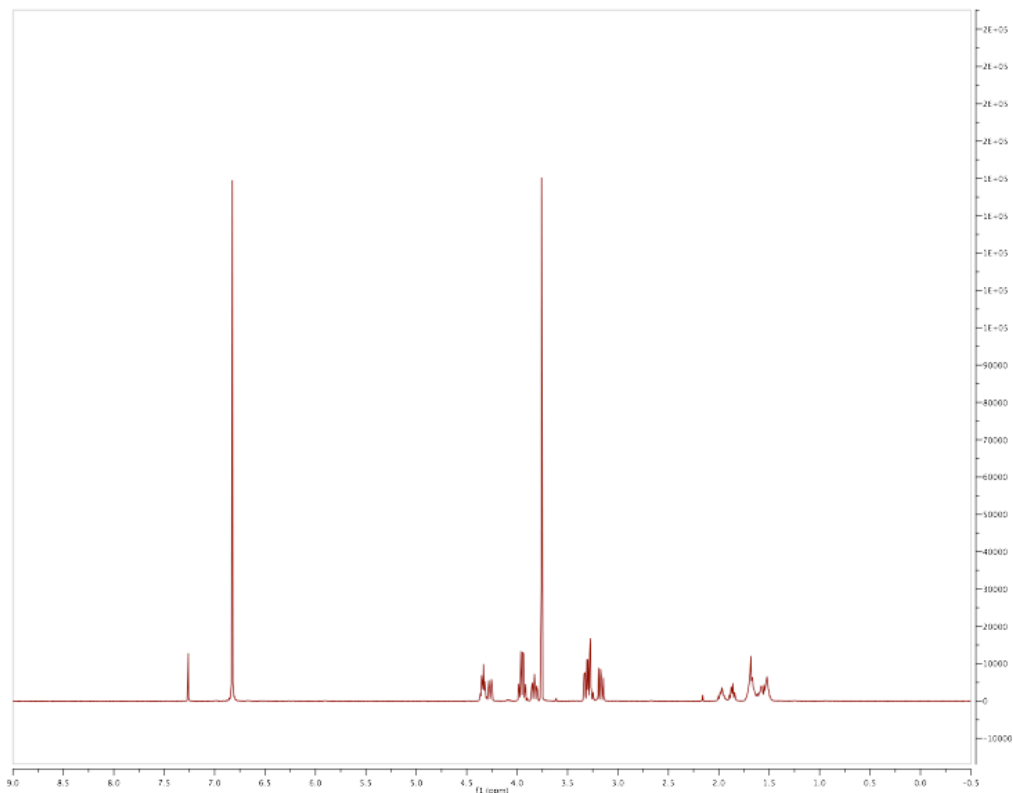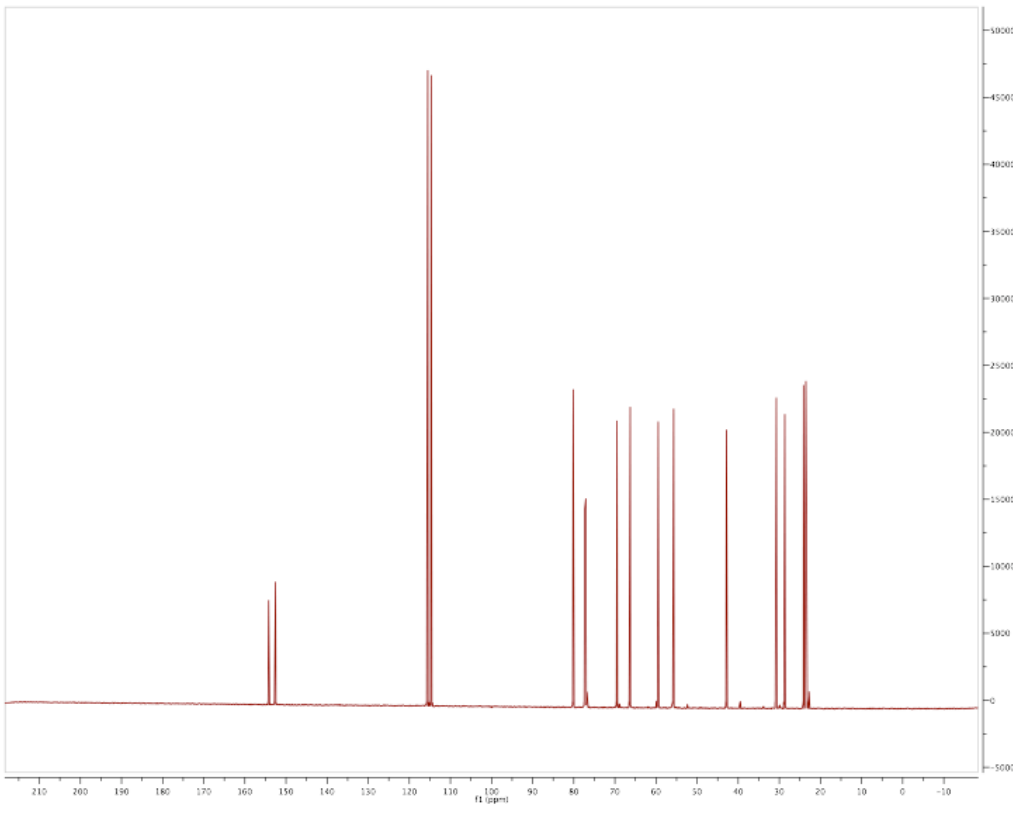



4-(Phenoxymethyl)-2-(prop-2-ynyl)-1,4-oxathiazepine-1,1-dioxide **23**

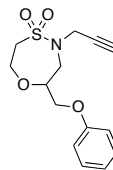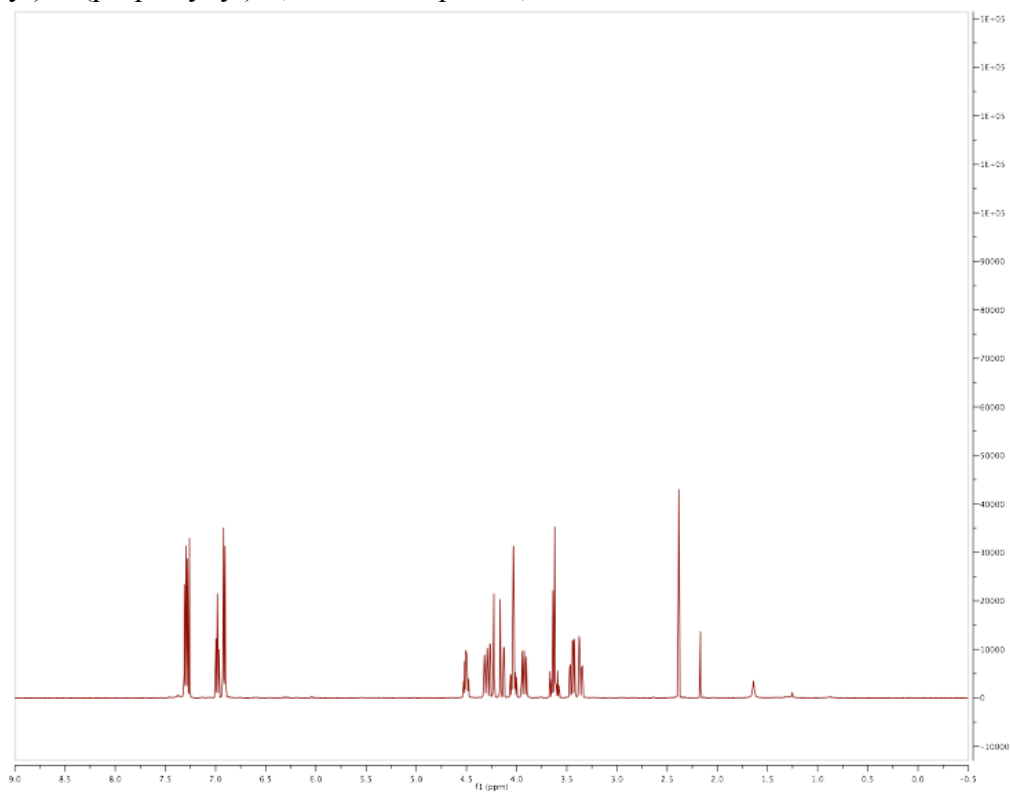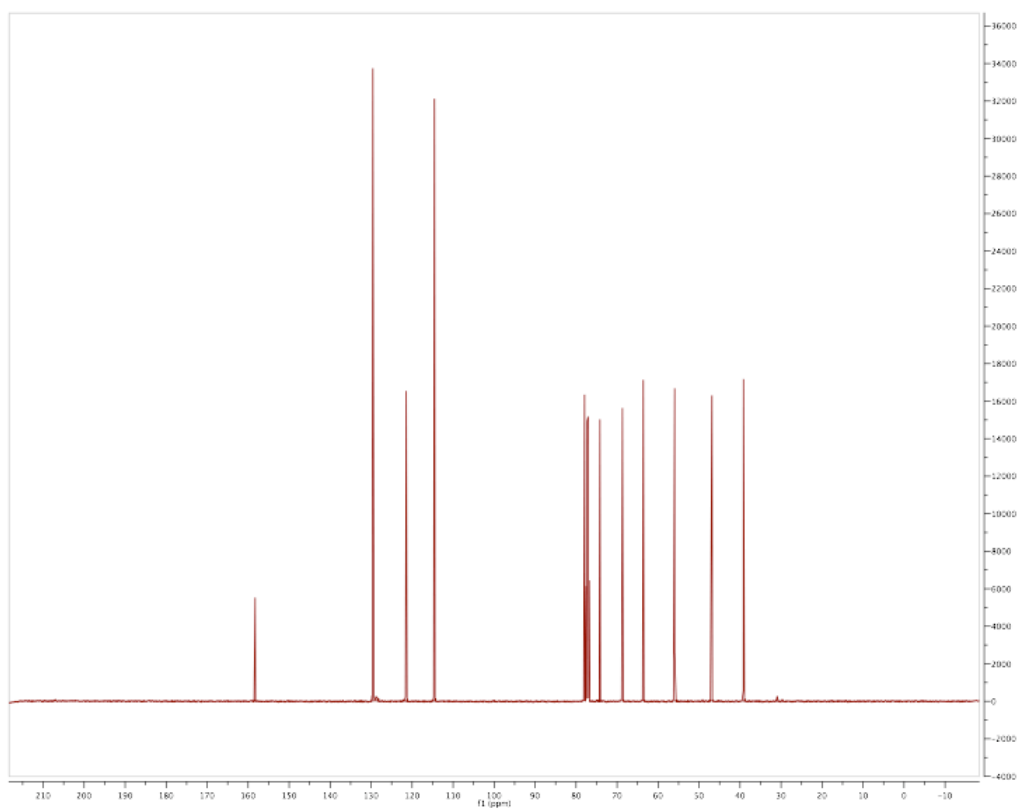

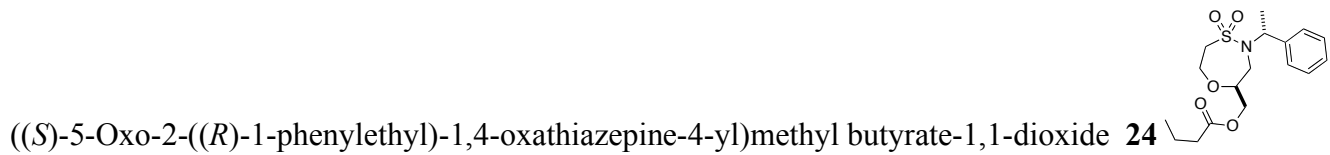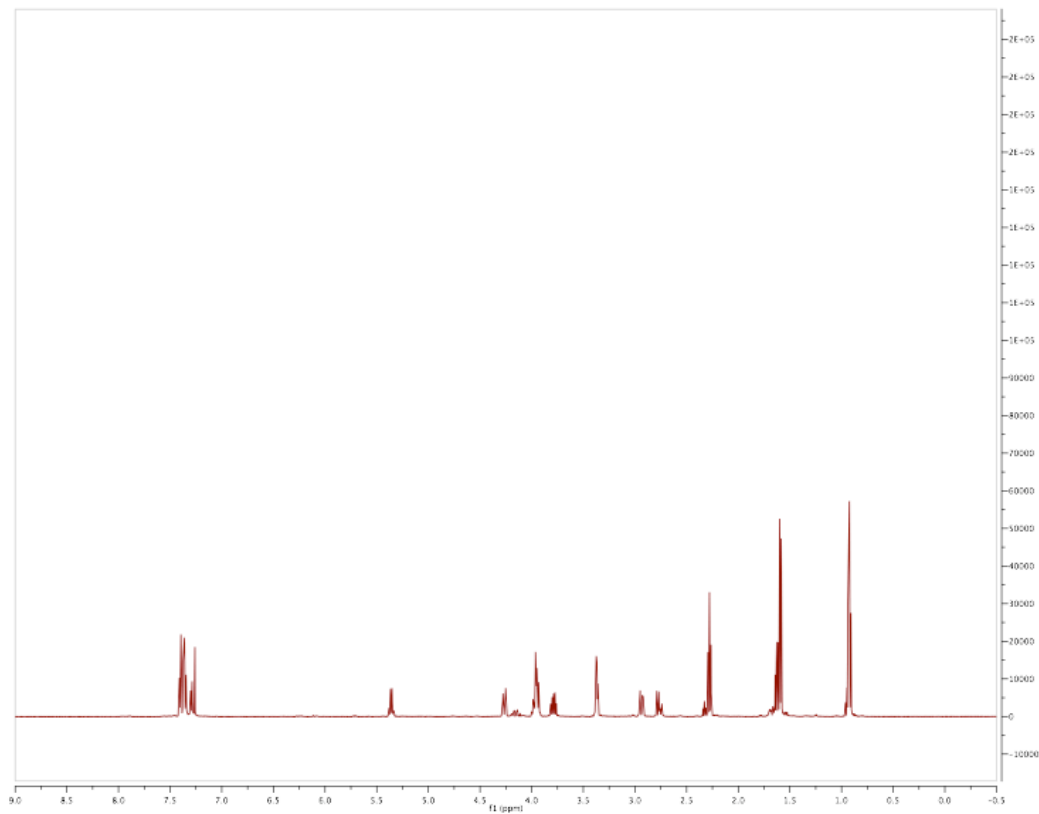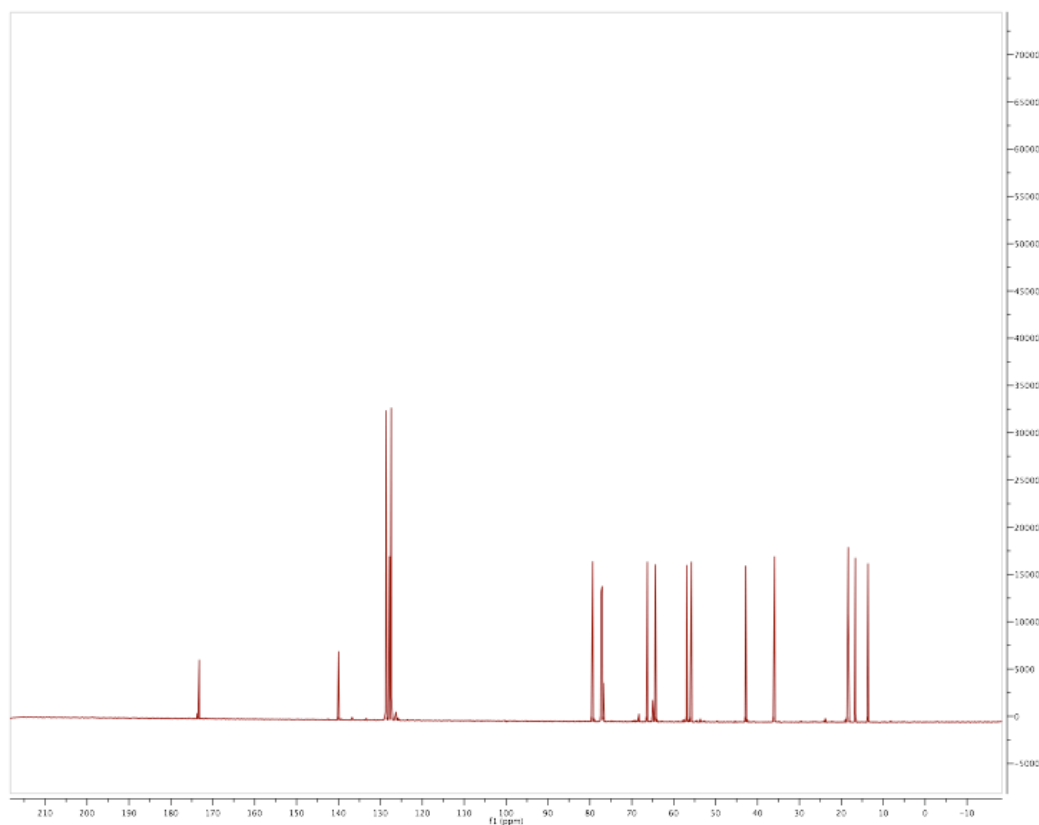

Supplement: NIHMS194350-supplement-1_si_001.pdf [file NIHMS194350-supplement-1_si_001.pdf]
